# Supplementary material for: Downregulation of the tyrosine degradation pathway extends Drosophila lifespan
Source: eLife journal article supplement (doi:10.7554/elife.58053), 2020-12-14
Supplement: supp [file elife-58053-supp-v1.zip]

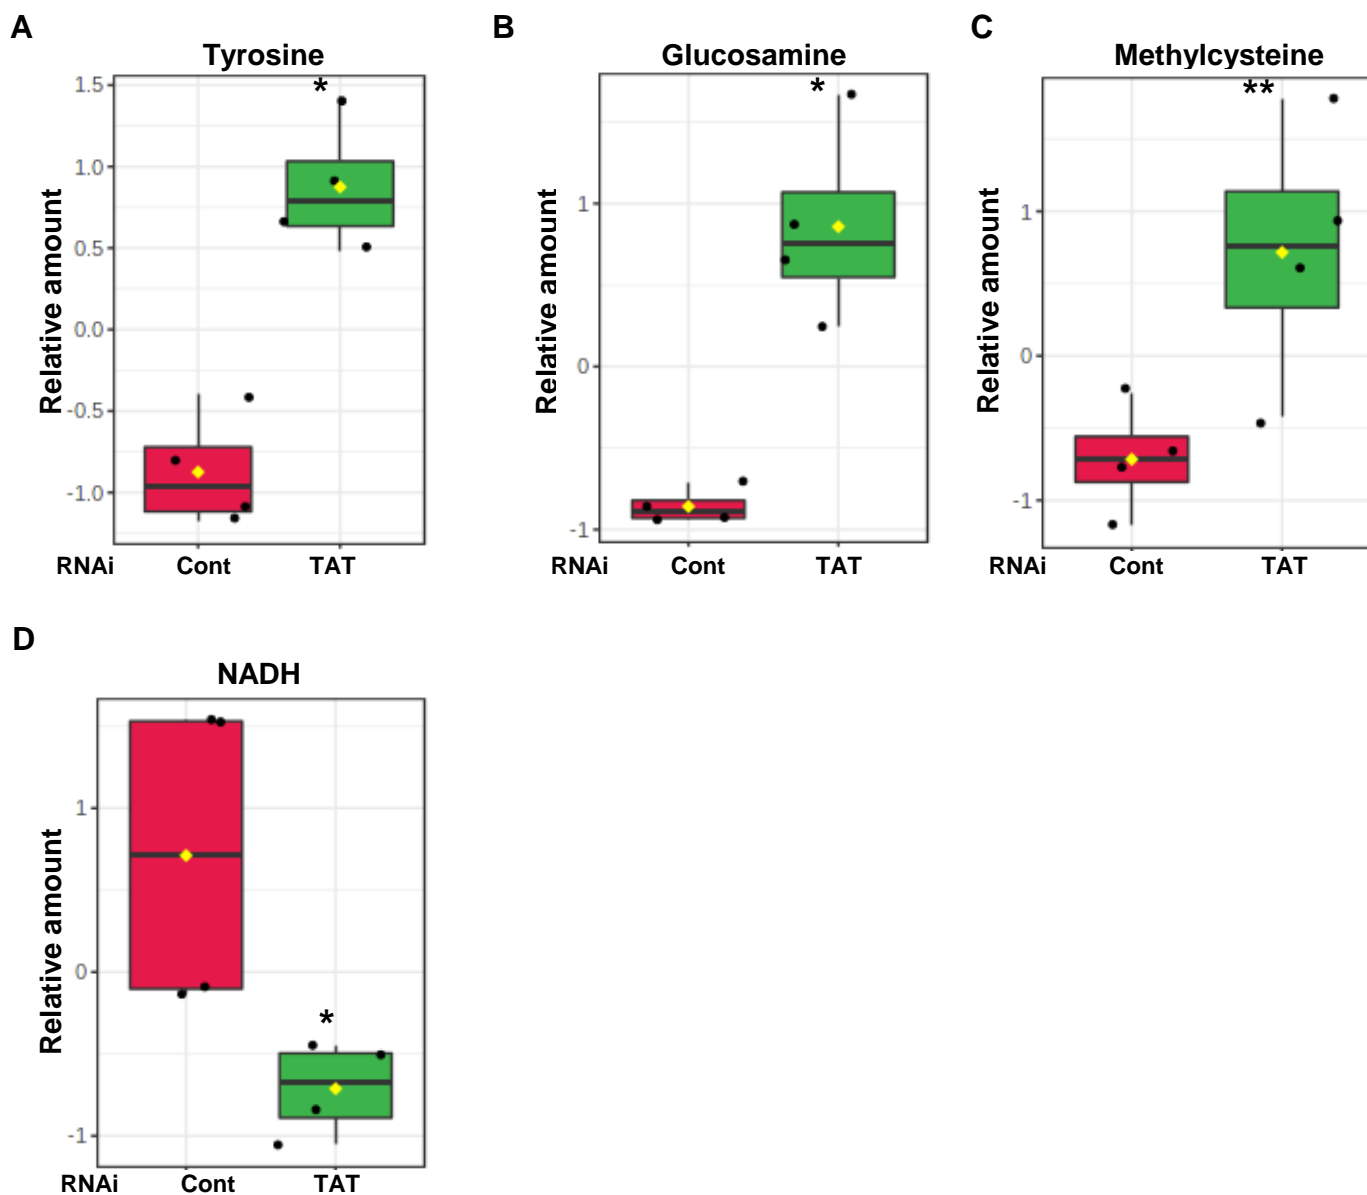

**Figure 3-figure supplement 1. Neuronal-specific downregulation of Tyrosine Aminotransferase/TAT leads to metabolic reprogramming similar to the whole-body downregulation of TAT.** Box plots of relative levels of tyrosine (A), glucosamine (B), methylcysteine (C), and NADH (D) in *elav-Gal4,tubulin-Gal80ts* flies expressing either control RNAi or *TAT* RNAi. FDR adjusted p-value. . \* $p < 0.05$ , \*\* $p < 0.01$
