# Supplementary material for: Downregulation of the tyrosine degradation pathway extends Drosophila lifespan
Source: eLife journal article supplement (doi:10.7554/elife.58053), 2020-12-14
Supplement: supp [file elife-58053-supp-v1.zip]

## Supplementary figures

### Figure 1-figure supplement 1

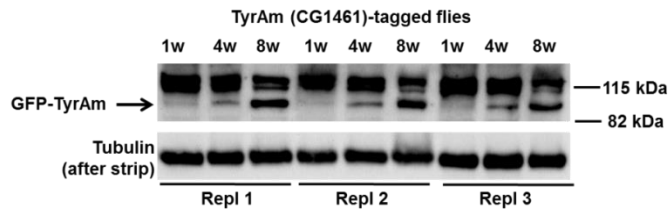

**Figure 1-figure supplement 1.** Immunoblot analysis of GFP and tubulin in 1w, 4w, and 8w CG1461(TyrAm)-GFP-tagged flies.
