# Supplementary material for: Downregulation of the tyrosine degradation pathway extends Drosophila lifespan
Source: eLife journal article supplement (doi:10.7554/elife.58053), 2020-12-14
Supplement: supp [file elife-58053-supp-v1.zip]

# Supplementary figures

Figure 4-figure supplement 1

**A**

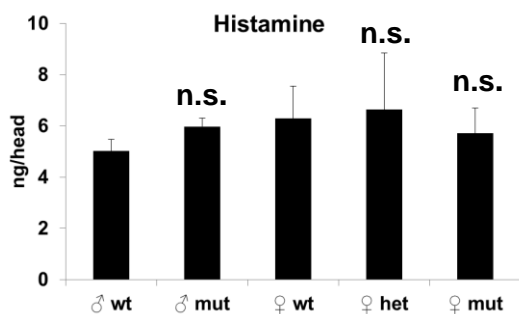

**B**

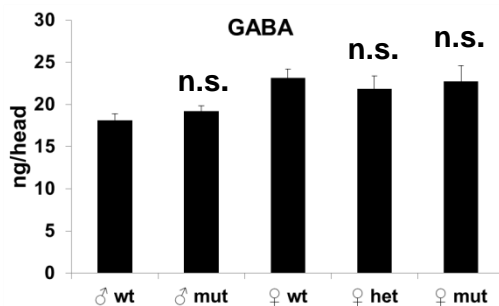

**C**

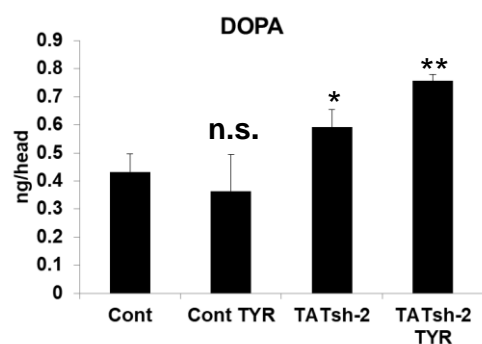

**D**

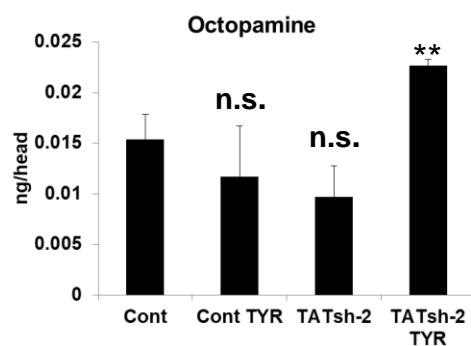

**E**

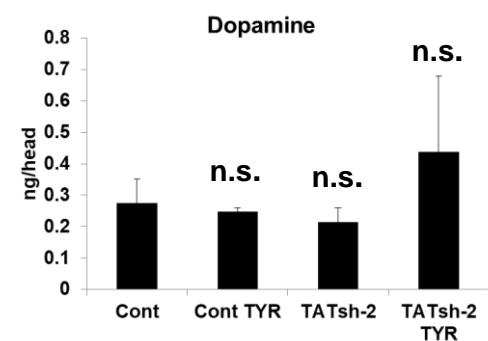

**F**

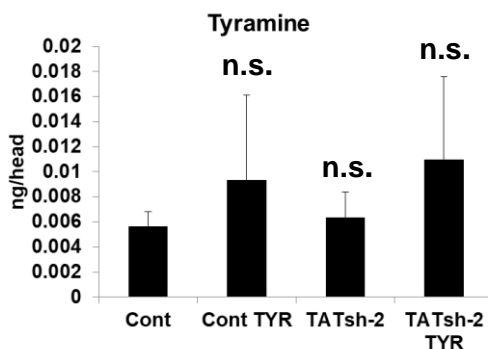

**G**

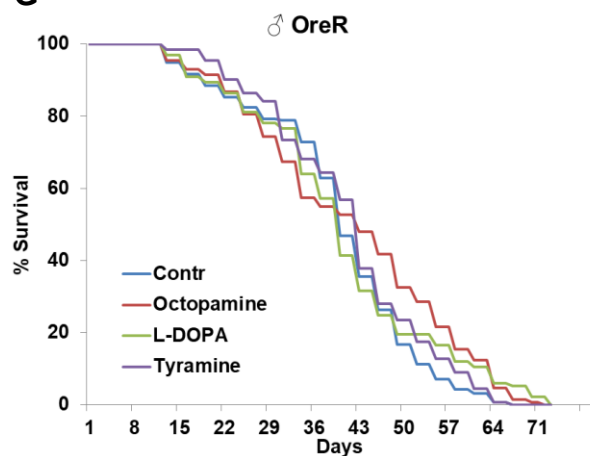

**H**

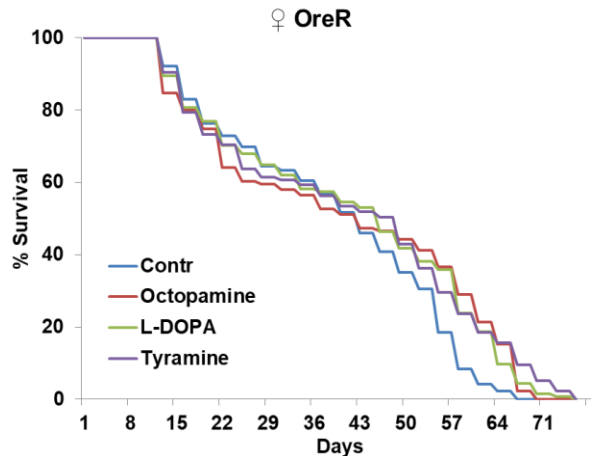

**Figure 4-figure supplement 1.** Head levels of Histamine (A) and GABA (B) in *CG1461/TAT* wild-type (wt), heterozygous (het), and mutant (mut) flies. Head levels of DOPA (C), Octopamine (D), Dopamine (E), Tyramine (F) in *elav-Gal4, tubulin-Gal80ts* control RNAi or TAT RNAi flies maintained either on the regular food or the food containing 5 mM of tyrosine for 2 days. Means  $\pm$  SD. \* $p < 0.05$ , \*\* $p < 0.01$ , \*\*\* $p < 0.001$ . Feeding adult male (G) and female (H) OreR flies with 5 mM Octopamine, L-DOPA, or Tyramine starting day 14.
