# Supplementary material for: Downregulation of the tyrosine degradation pathway extends Drosophila lifespan
Source: eLife journal article supplement (doi:10.7554/elife.58053), 2020-12-14
Supplement: supp [file elife-58053-supp-v1.zip]

## Supplementary figures

### Figure 6-figure supplement 1

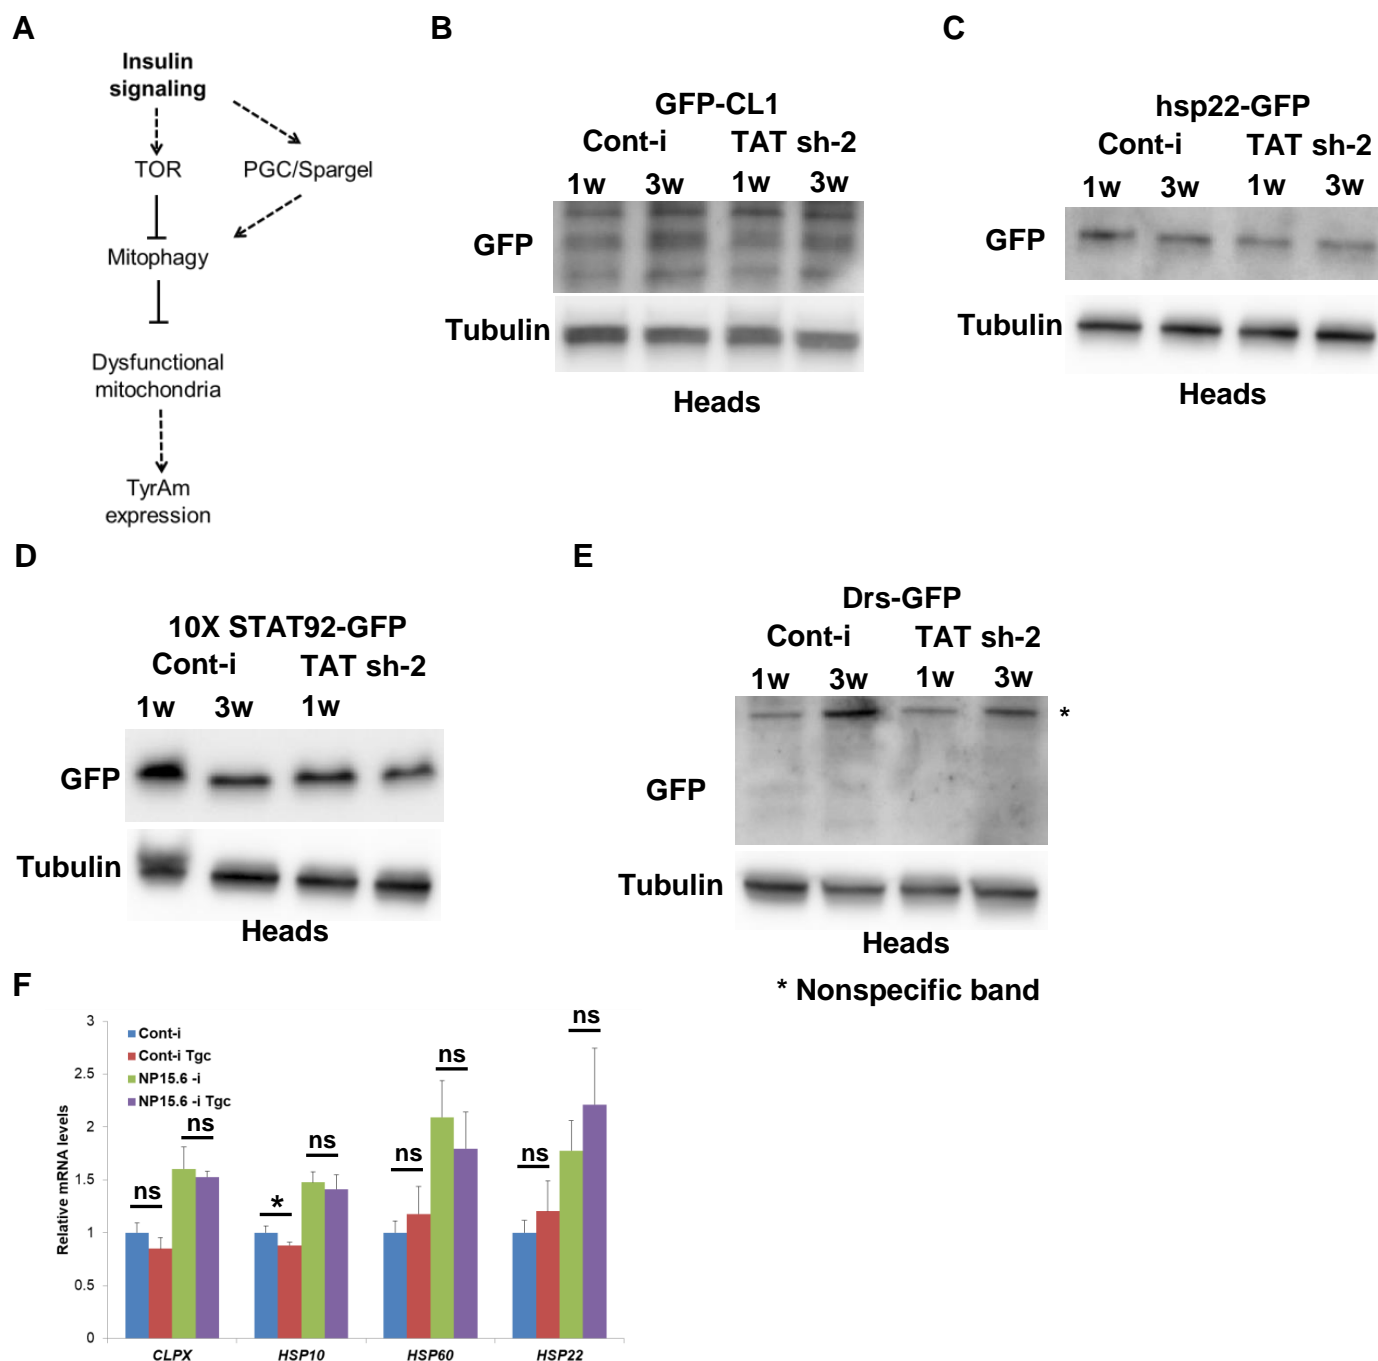

**Figure 6-figure supplement 1.** (A) Schematic diagram of mitophagy/mitochondrial biogenesis regulation by Insulin signaling, TOR, and PGC1a/Spargel. (B) Immunoblot analysis of GFP and tubulin in heads of 1w and 3w old *tubulin-Gal80ts*, *elav-Gal4* flies in the presence of GFP-CL1 (B), hsp22-GFP (C), 10XSTAT92-GFP (D), Drs-GFP (E) reporters expressing either control or TAT RNAi. (F) Relative mRNA levels of *CLPX*, *HSP10*, *HSP60*, and *HSP22* in *tubulin-Gal80ts*, *tubulin-Gal4* flies expressing either control RNAi or *NP15.6* RNAi and fed with either control or 100 uM Tigecycline. Means  $\pm$  SD.
