# Supplementary material for: Downregulation of the tyrosine degradation pathway extends Drosophila lifespan
Source: eLife. 2020 Dec 15;9:e58053. doi: 10.7554/eLife.58053 (PMC7744100; doi:10.7554/eLife.58053)
Supplement: Supplementary file 1. [file elife-58053-supp1.xlsx]

## Sheet: Sheet1
Supplementary File 1. Lifespan counts
Figure 2c
Feeding adult flies with 5 g/L of tyrosine significantly suppresses lifespan of flies with ubiquitous adult-onset downregulation of CG1461. Arrow indicates the beginning of tyrosine feeding. p < 0.001
3 replicates/condition, combined
Days		1	2	3	4	5	6	7	8	9	10	11	12	13	14	15	16	17	18	19	20	21	22	23	24	25	26	27	28	29	30	31	32	33	34	35	36	37	38	39	40	41	42	43	44	45	46	47	48
no RNAi		0	0	0	0	0	0	0	0	0	0	0	0	0	0	0	0	0	0	0	0	0	0	0	0	0	0	0	0	0	0	0	1	0	0	0	0	0	1	0	3	0	0	9	0	0	23	0	0
Contr-i		0	0	0	0	0	0	0	0	0	0	0	0	0	0	0	0	0	0	0	0	0	0	0	0	0	0	0	0	0	0	0	2	0	0	2	0	0	5	0	6	0	0	5	0	0	10	0	0
TAT sh-1		0	0	0	0	0	0	0	0	0	0	0	0	0	0	0	2	0	7	0	6	0	9	0	4	0	5	0	1	0	0	0	4	0	0	2	0	0	4	0	4	0	0	3	0	0	5	0	0
TAT sh-2		0	0	0	0	0	0	0	0	0	0	0	0	0	0	0	1	0	11	0	18	0	11	0	4	0	0	0	6	0	3	0	11	0	0	10	0	0	4	0	0	0	0	0	0	0	0	0	0
TAT sh-3		0	0	0	0	0	0	0	0	0	0	0	0	0	0	0	7	0	17	0	21	0	6	0	6	0	10	0	2	0	1	0	0	0	0	0	0	0	0	0	0	0	0	0	0	0	0	0	0
Days		1	2	3	4	5	6	7	8	9	10	11	12	13	14	15	16	17	18	19	20	21	22	23	24	25	26	27	28	29	30	31	32	33	34	35	36	37	38	39	40	41	42	43	44	45	46	47	48
no RNAi		76	76	76	76	76	76	76	76	76	76	76	76	76	76	76	76	76	76	76	76	76	76	76	76	76	76	76	76	76	76	76	76	75	75	75	75	75	75	74	74	71	71	71	62	62	62	39	39
Contr-i		81	81	81	81	81	81	81	81	81	81	81	81	81	81	81	81	81	81	81	81	81	81	81	81	81	81	81	81	81	81	81	81	79	79	79	77	77	77	72	72	66	66	66	61	61	61	51	51
TAT sh-1		76	76	76	76	76	76	76	76	76	76	76	76	76	76	76	76	74	74	67	67	61	61	52	52	48	48	43	43	42	42	42	42	38	38	38	36	36	36	32	32	28	28	28	25	25	25	20	20
TAT sh-2		79	79	79	79	79	79	79	79	79	79	79	79	79	79	79	79	78	78	67	67	49	49	38	38	34	34	34	34	28	28	25	25	14	14	14	4	4	4	0	0	0	0	0	0	0	0	0	0
TAT sh-3		70	70	70	70	70	70	70	70	70	70	70	70	70	70	70	70	63	63	46	46	25	25	19	19	13	13	3	3	1	1	0	0	0	0	0	0	0	0	0	0	0	0	0	0	0	0	0	0
Days		1	2	3	4	5	6	7	8	9	10	11	12	13	14	15	16	17	18	19	20	21	22	23	24	25	26	27	28	29	30	31	32	33	34	35	36	37	38	39	40	41	42	43	44	45	46	47	48
no RNAi		100	100	100	100	100	100	100	100	100	100	100	100	100	100	100	100	100	100	100	100	100	100	100	100	100	100	100	100	100	100	100	100	98.6842	98.6842	98.6842	98.6842	98.6842	98.6842	97.3684	97.3684	93.4211	93.4211	93.4211	81.5789	81.5789	81.5789	51.3158	51.3158
Contr-i		100	100	100	100	100	100	100	100	100	100	100	100	100	100	100	100	100	100	100	100	100	100	100	100	100	100	100	100	100	100	100	100	97.5309	97.5309	97.5309	95.0617	95.0617	95.0617	88.8889	88.8889	81.4815	81.4815	81.4815	75.3086	75.3086	75.3086	62.963	62.963
TAT sh-1		100	100	100	100	100	100	100	100	100	100	100	100	100	100	100	100	97.3684	97.3684	88.1579	88.1579	80.2632	80.2632	68.4211	68.4211	63.1579	63.1579	56.5789	56.5789	55.2632	55.2632	55.2632	55.2632	50	50	50	47.3684	47.3684	47.3684	42.1053	42.1053	36.8421	36.8421	36.8421	32.8947	32.8947	32.8947	26.3158	26.3158
TAT sh-2		100	100	100	100	100	100	100	100	100	100	100	100	100	100	100	100	98.7342	98.7342	84.8101	84.8101	62.0253	62.0253	48.1013	48.1013	43.038	43.038	43.038	43.038	35.443	35.443	31.6456	31.6456	17.7215	17.7215	17.7215	5.06329	5.06329	5.06329	0	0	0	0	0	0	0	0	0	0
TAT sh-3		100	100	100	100	100	100	100	100	100	100	100	100	100	100	100	100	90	90	65.7143	65.7143	35.7143	35.7143	27.1429	27.1429	18.5714	18.5714	4.28571	4.28571	1.42857	1.42857	0	0	0	0	0	0	0	0	0	0	0	0	0	0	0	0	0	0
Figure 2d
Feeding adult flies with 5 g/L of tyrosine significantly suppresses lifespan of CG1461 mutant but not wild-type or heterozygous flies. Arrow indicates the beginning of tyrosine feeding. p < 0.001
8-10 replicates/condition, combined
Days	1	2	3	4	5	6	7	8	9	10	11	12	13	14	15	16	17	18	19	20	21	22	23	24	25	26	27	28	29	30	31	32	33	34	35	36	37	38	39	40	41	42	43	44	45	46	47	48	49
WT	0	0	0	0	0	0	0	0	0	0	4	0	0	0	0	0	1	0	0	5	0	0	0	0	0	1	0	0	2	0	0	1	0	0	2	0	0	11	0	0	6	0	0	10	0	0	5	0	0
HET	0	0	0	0	0	0	0	0	0	0	1	0	0	2	0	0	2	0	0	1	0	0	0	0	0	0	0	0	0	0	0	3	0	0	3	0	0	7	0	0	5	0	0	10	0	0	2	0	0
MUT	0	0	0	0	0	0	0	0	0	0	0	0	0	3	0	0	2	0	0	1	0	0	1	0	0	1	0	0	3	0	0	2	0	0	1	0	0	17	0	0	2	0	0	18	0	0	5	0	0
WT +TYR	0	0	0	0	0	0	0	0	0	0	0	0	0	0	3	0	0	2	0	0	4	0	0	2	0	0	3	0	0	8	0	0	5	0	0	7	0	0	8	0	0	7	0	0	10	0	0	14	0
HET +TYR	0	0	0	0	0	0	0	0	0	0	0	0	0	0	0	0	0	0	0	0	4	0	0	2	0	0	0	0	0	2	0	0	4	0	0	8	0	0	8	0	0	16	0	0	26	0	0	24	0
MUT +TYR	0	0	0	0	0	1	0	0	0	0	0	0	0	0	64	0	0	120	0	0	45	0	0	13	0	0	2	0	0	0	0	0	0	0	0	0	0	0	0	0	0	0	0	0	0	0	0	0	0
Days	1	2	3	4	5	6	7	8	9	10	11	12	13	14	15	16	17	18	19	20	21	22	23	24	25	26	27	28	29	30	31	32	33	34	35	36	37	38	39	40	41	42	43	44	45	46	47	48	49
WT	219	219	219	219	219	219	219	219	219	219	219	215	215	215	215	215	215	214	214	214	209	209	209	209	209	209	208	208	208	206	206	206	205	205	205	203	203	203	192	192	192	186	186	186	176	176	176	171	171
HET	186	186	186	186	186	186	186	186	186	186	186	185	185	185	183	183	183	181	181	181	180	180	180	180	180	180	180	180	180	180	180	180	177	177	177	174	174	174	167	167	167	162	162	162	152	152	152	150	150
MUT	219	219	219	219	219	219	219	219	219	219	219	219	219	219	216	216	216	214	214	214	213	213	213	212	212	212	211	211	211	208	208	208	206	206	206	205	205	205	188	188	188	186	186	186	168	168	168	163	163
WT +TYR	192	192	192	192	192	192	192	192	192	192	192	192	192	192	192	189	189	189	187	187	187	183	183	183	181	181	181	178	178	178	170	170	170	165	165	165	158	158	158	150	150	150	143	143	143	133	133	133	119
HET +TYR	236	236	236	236	236	236	236	236	236	236	236	236	236	236	236	236	236	236	236	236	236	232	232	232	230	230	230	230	230	230	228	228	228	224	224	224	216	216	216	208	208	208	192	192	192	166	166	166	142
MUT +TYR	245	245	245	245	245	245	244	244	244	244	244	244	244	244	244	180	180	180	60	60	60	15	15	15	2	2	2	0	0	0	0	0	0	0	0	0	0	0	0	0	0	0	0	0	0	0	0	0	0
Days	1	2	3	4	5	6	7	8	9	10	11	12	13	14	15	16	17	18	19	20	21	22	23	24	25	26	27	28	29	30	31	32	33	34	35	36	37	38	39	40	41	42	43	44	45	46	47	48	49
WT	100	100	100	100	100	100	100	100	100	100	100	98.1735	98.1735	98.1735	98.1735	98.1735	98.1735	97.7169	97.7169	97.7169	95.4338	95.4338	95.4338	95.4338	95.4338	95.4338	94.9772	94.9772	94.9772	94.0639	94.0639	94.0639	93.6073	93.6073	93.6073	92.6941	92.6941	92.6941	87.6712	87.6712	87.6712	84.9315	84.9315	84.9315	80.3653	80.3653	80.3653	78.0822	78.0822
HET	100	100	100	100	100	100	100	100	100	100	100	99.4624	99.4624	99.4624	98.3871	98.3871	98.3871	97.3118	97.3118	97.3118	96.7742	96.7742	96.7742	96.7742	96.7742	96.7742	96.7742	96.7742	96.7742	96.7742	96.7742	96.7742	95.1613	95.1613	95.1613	93.5484	93.5484	93.5484	89.7849	89.7849	89.7849	87.0968	87.0968	87.0968	81.7204	81.7204	81.7204	80.6452	80.6452
MUT	100	100	100	100	100	100	100	100	100	100	100	100	100	100	98.6301	98.6301	98.6301	97.7169	97.7169	97.7169	97.2603	97.2603	97.2603	96.8037	96.8037	96.8037	96.347	96.347	96.347	94.9772	94.9772	94.9772	94.0639	94.0639	94.0639	93.6073	93.6073	93.6073	85.8447	85.8447	85.8447	84.9315	84.9315	84.9315	76.7123	76.7123	76.7123	74.4292	74.4292
WT +TYR	100	100	100	100	100	100	100	100	100	100	100	100	100	100	100	98.4375	98.4375	98.4375	97.3958	97.3958	97.3958	95.3125	95.3125	95.3125	94.2708	94.2708	94.2708	92.7083	92.7083	92.7083	88.5417	88.5417	88.5417	85.9375	85.9375	85.9375	82.2917	82.2917	82.2917	78.125	78.125	78.125	74.4792	74.4792	74.4792	69.2708	69.2708	69.2708	61.9792
HET +TYR	100	100	100	100	100	100	100	100	100	100	100	100	100	100	100	100	100	100	100	100	100	98.3051	98.3051	98.3051	97.4576	97.4576	97.4576	97.4576	97.4576	97.4576	96.6102	96.6102	96.6102	94.9153	94.9153	94.9153	91.5254	91.5254	91.5254	88.1356	88.1356	88.1356	81.3559	81.3559	81.3559	70.339	70.339	70.339	60.1695
MUT +TYR	100	100	100	100	100	100	99.5918	99.5918	99.5918	99.5918	99.5918	99.5918	99.5918	99.5918	99.5918	73.4694	73.4694	73.4694	24.4898	24.4898	24.4898	6.12245	6.12245	6.12245	0.816327	0.816327	0.816327	0	0	0	0	0	0	0	0	0	0	0	0	0	0	0	0	0	0	0	0	0	0
Figure 3a
Ubiquitous adult-onset expression of CG1461 RNAi -1 increases lifespan in females. p < 0.0001
10 replicates/condition, combined
Days		1	2	3	4	5	6	7	8	9	10	11	12	13	14	15	16	17	18	19	20	21	22	23	24	25	26	27	28	29	30	31	32	33	34	35	36	37	38	39	40	41	42	43	44	45	46	47	48
EtOH		0	0	0	0	0	0	0	0	0	0	0	0	0	0	0	0	0	0	2	0	0	0	0	0	0	1	0	0	0	0	0	0	0	1	0	0	0	0	0	0	0	0	0	0	0	0	0	0
RU486		0	0	0	0	0	0	0	0	0	0	0	0	0	0	0	0	0	0	0	0	0	0	0	0	0	0	0	0	0	0	0	0	0	0	0	0	0	0	0	0	0	0	0	0	0	0	0	0
Days		1	2	3	4	5	6	7	8	9	10	11	12	13	14	15	16	17	18	19	20	21	22	23	24	25	26	27	28	29	30	31	32	33	34	35	36	37	38	39	40	41	42	43	44	45	46	47	48
EtOH		225	225	225	225	225	225	225	225	225	225	225	225	225	225	225	225	225	225	225	223	223	223	223	223	223	223	222	222	222	222	222	222	222	222	221	221	221	221	221	221	221	221	221	221	221	221	221	221
RU486		231	231	231	231	231	231	231	231	231	231	231	231	231	231	231	231	231	231	231	231	231	231	231	231	231	231	231	231	231	231	231	231	231	231	231	231	231	231	231	231	231	231	231	231	231	231	231	231
Days		1	2	3	4	5	6	7	8	9	10	11	12	13	14	15	16	17	18	19	20	21	22	23	24	25	26	27	28	29	30	31	32	33	34	35	36	37	38	39	40	41	42	43	44	45	46	47	48
EtOH		100	100	100	100	100	100	100	100	100	100	100	100	100	100	100	100	100	100	100	99.1111	99.1111	99.1111	99.1111	99.1111	99.1111	99.1111	98.6667	98.6667	98.6667	98.6667	98.6667	98.6667	98.6667	98.6667	98.2222	98.2222	98.2222	98.2222	98.2222	98.2222	98.2222	98.2222	98.2222	98.2222	98.2222	98.2222	98.2222	98.2222
RU486		100	100	100	100	100	100	100	100	100	100	100	100	100	100	100	100	100	100	100	100	100	100	100	100	100	100	100	100	100	100	100	100	100	100	100	100	100	100	100	100	100	100	100	100	100	100	100	100
Figure 3b
Ubiquitous adult-onset expression of CG1461 RNAi -3 increases lifespan in females. p < 0.0001.
9 replicates/condition, combined
Days		1	2	3	4	5	6	7	8	9	10	11	12	13	14	15	16	17	18	19	20	21	22	23	24	25	26	27	28	29	30	31	32	33	34	35	36	37	38	39	40	41	42	43	44	45	46	47	48
EtOH		0	0	0	0	0	0	0	0	0	0	0	0	0	0	0	0	0	0	0	0	0	1	0	0	0	0	0	3	0	0	1	1	0	4	0	0	0	0	2	7	0	0	0	2	2	0	0	0
RU486		0	0	0	0	0	0	0	0	0	0	0	0	0	0	0	0	0	0	0	0	0	0	0	0	0	0	0	0	0	0	0	0	0	0	0	0	0	0	3	1	0	0	1	0	2	0	0	0
Days		1	2	3	4	5	6	7	8	9	10	11	12	13	14	15	16	17	18	19	20	21	22	23	24	25	26	27	28	29	30	31	32	33	34	35	36	37	38	39	40	41	42	43	44	45	46	47	48
EtOH		229	229	229	229	229	229	229	229	229	229	229	229	229	229	229	229	229	229	229	229	229	229	228	228	228	228	228	228	225	225	225	224	223	223	219	219	219	219	219	217	210	210	210	210	208	206	206	206
RU486		213	213	213	213	213	213	213	213	213	213	213	213	213	213	213	213	213	213	213	213	213	213	213	213	213	213	213	213	213	213	213	213	213	213	213	213	213	213	213	210	209	209	209	208	208	206	206	206
Days		1	2	3	4	5	6	7	8	9	10	11	12	13	14	15	16	17	18	19	20	21	22	23	24	25	26	27	28	29	30	31	32	33	34	35	36	37	38	39	40	41	42	43	44	45	46	47	48
EtOH		100	100	100	100	100	100	100	100	100	100	100	100	100	100	100	100	100	100	100	100	100	100	99.5633	99.5633	99.5633	99.5633	99.5633	99.5633	98.2533	98.2533	98.2533	97.8166	97.3799	97.3799	95.6332	95.6332	95.6332	95.6332	95.6332	94.7598	91.7031	91.7031	91.7031	91.7031	90.8297	89.9563	89.9563	89.9563
RU486		100	100	100	100	100	100	100	100	100	100	100	100	100	100	100	100	100	100	100	100	100	100	100	100	100	100	100	100	100	100	100	100	100	100	100	100	100	100	100	98.5915	98.1221	98.1221	98.1221	97.6526	97.6526	96.7136	96.7136	96.7136
Figure 3c
Ubiquitous adult-onset expression of CG11796 RNAi increases lifespan in females. p < 0.0001.
7 replicates/condition, combined
Days		1	2	3	4	5	6	7	8	9	10	11	12	13	14	15	16	17	18	19	20	21	22	23	24	25	26	27	28	29	30	31	32	33	34	35	36	37	38	39	40	41	42	43	44	45	46	47	48
EtOH		0	0	0	0	0	0	0	0	0	1	0	0	0	0	0	0	0	1	1	0	0	0	0	2	0	0	0	0	0	0	0	0	0	0	0	0	0	1	0	0	0	0	0	0	0	0	0	4
RU486		0	0	0	0	0	0	0	0	0	0	0	0	0	0	2	0	0	0	0	2	0	0	0	0	0	0	0	0	2	1	0	1	0	0	0	0	0	0	0	0	0	0	0	0	0	0	0	0
Days		1	2	3	4	5	6	7	8	9	10	11	12	13	14	15	16	17	18	19	20	21	22	23	24	25	26	27	28	29	30	31	32	33	34	35	36	37	38	39	40	41	42	43	44	45	46	47	48
EtOH		133	133	133	133	133	133	133	133	133	133	132	132	132	132	132	132	132	132	131	130	130	130	130	130	128	128	128	128	128	128	128	128	128	128	128	128	128	128	127	127	127	127	127	127	127	127	127	127
RU486		136	136	136	136	136	136	136	136	136	136	136	136	136	136	136	134	134	134	134	134	132	132	132	132	132	132	132	132	132	130	129	129	128	128	128	128	128	128	128	128	128	128	128	128	128	128	128	128
Days		1	2	3	4	5	6	7	8	9	10	11	12	13	14	15	16	17	18	19	20	21	22	23	24	25	26	27	28	29	30	31	32	33	34	35	36	37	38	39	40	41	42	43	44	45	46	47	48
EtOH		100	100	100	100	100	100	100	100	100	100	99.2481	99.2481	99.2481	99.2481	99.2481	99.2481	99.2481	99.2481	98.4962	97.7444	97.7444	97.7444	97.7444	97.7444	96.2406	96.2406	96.2406	96.2406	96.2406	96.2406	96.2406	96.2406	96.2406	96.2406	96.2406	96.2406	96.2406	96.2406	95.4887	95.4887	95.4887	95.4887	95.4887	95.4887	95.4887	95.4887	95.4887	95.4887
RU486		100	100	100	100	100	100	100	100	100	100	100	100	100	100	100	98.5294	98.5294	98.5294	98.5294	98.5294	97.0588	97.0588	97.0588	97.0588	97.0588	97.0588	97.0588	97.0588	97.0588	95.5882	94.8529	94.8529	94.1176	94.1176	94.1176	94.1176	94.1176	94.1176	94.1176	94.1176	94.1176	94.1176	94.1176	94.1176	94.1176	94.1176	94.1176	94.1176
Figure 3d
Ubiquitous adult-onset expression of Hgo RNAi increases lifespan in females. p < 0.0001.
7 replicates/condition, combined
Days		1	2	3	4	5	6	7	8	9	10	11	12	13	14	15	16	17	18	19	20	21	22	23	24	25	26	27	28	29	30	31	32	33	34	35	36	37	38	39	40	41	42	43	44	45	46	47	48
EtOH		0	0	0	0	0	0	0	0	0	0	0	0	0	0	0	0	0	0	2	0	0	0	0	1	0	0	0	0	0	0	0	0	0	0	3	0	0	2	0	0	0	0	0	0	1	0	0	2
RU486		0	0	0	0	0	0	0	0	0	0	0	0	0	0	0	0	3	0	0	2	0	0	0	1	0	0	0	0	0	0	1	0	0	0	1	0	0	0	1	0	0	0	0	0	0	0	0	1
Days		1	2	3	4	5	6	7	8	9	10	11	12	13	14	15	16	17	18	19	20	21	22	23	24	25	26	27	28	29	30	31	32	33	34	35	36	37	38	39	40	41	42	43	44	45	46	47	48
EtOH		157	157	157	157	157	157	157	157	157	157	157	157	157	157	157	157	157	157	157	155	155	155	155	155	154	154	154	154	154	154	154	154	154	154	154	151	151	151	149	149	149	149	149	149	149	148	148	148
RU486		170	170	170	170	170	170	170	170	170	170	170	170	170	170	170	170	170	167	167	167	165	165	165	165	164	164	164	164	164	164	164	163	163	163	163	162	162	162	162	161	161	161	161	161	161	161	161	161
Days		1	2	3	4	5	6	7	8	9	10	11	12	13	14	15	16	17	18	19	20	21	22	23	24	25	26	27	28	29	30	31	32	33	34	35	36	37	38	39	40	41	42	43	44	45	46	47	48
EtOH		100	100	100	100	100	100	100	100	100	100	100	100	100	100	100	100	100	100	100	98.7261	98.7261	98.7261	98.7261	98.7261	98.0892	98.0892	98.0892	98.0892	98.0892	98.0892	98.0892	98.0892	98.0892	98.0892	98.0892	96.1783	96.1783	96.1783	94.9045	94.9045	94.9045	94.9045	94.9045	94.9045	94.9045	94.2675	94.2675	94.2675
RU486		100	100	100	100	100	100	100	100	100	100	100	100	100	100	100	100	100	98.2353	98.2353	98.2353	97.0588	97.0588	97.0588	97.0588	96.4706	96.4706	96.4706	96.4706	96.4706	96.4706	96.4706	95.8824	95.8824	95.8824	95.8824	95.2941	95.2941	95.2941	95.2941	94.7059	94.7059	94.7059	94.7059	94.7059	94.7059	94.7059	94.7059	94.7059
Figure 3e
Fat body-specific adult-onset expression of CG1461 RNAi does not affect lifespan in females.
5-6 replicates/condition, combined
Days		1	2	3	4	5	6	7	8	9	10	11	12	13	14	15	16	17	18	19	20	21	22	23	24	25	26	27	28	29	30	31	32	33	34	35	36	37	38	39	40	41	42	43	44	45	46	47	48
EtOH		0	0	0	0	0	0	0	0	0	0	0	0	0	0	0	0	1	0	0	0	1	1	0	0	0	0	1	1	0	1	0	2	0	0	0	2	1	0	1	0	0	1	0	0	0	0	0	1
RU486		0	0	0	0	0	0	0	0	0	0	0	1	0	3	0	0	0	0	0	0	0	0	0	0	0	0	1	2	0	1	0	0	0	1	0	0	0	0	0	0	1	0	0	1	0	0	0	2
Days		1	2	3	4	5	6	7	8	9	10	11	12	13	14	15	16	17	18	19	20	21	22	23	24	25	26	27	28	29	30	31	32	33	34	35	36	37	38	39	40	41	42	43	44	45	46	47	48
EtOH		103	103	103	103	103	103	103	103	103	103	103	103	103	103	103	103	103	102	102	102	102	101	100	100	100	100	100	99	98	98	97	97	95	95	95	95	93	92	92	91	91	91	90	90	90	90	90	90
RU486		131	131	131	131	131	131	131	131	131	131	131	131	130	130	127	127	127	127	127	127	127	127	127	127	127	127	127	126	124	124	123	123	123	123	122	122	122	122	122	122	122	121	121	121	120	120	120	120
Days		1	2	3	4	5	6	7	8	9	10	11	12	13	14	15	16	17	18	19	20	21	22	23	24	25	26	27	28	29	30	31	32	33	34	35	36	37	38	39	40	41	42	43	44	45	46	47	48
EtOH		100	100	100	100	100	100	100	100	100	100	100	100	100	100	100	100	100	99.0291	99.0291	99.0291	99.0291	98.0583	97.0874	97.0874	97.0874	97.0874	97.0874	96.1165	95.1456	95.1456	94.1748	94.1748	92.233	92.233	92.233	92.233	90.2913	89.3204	89.3204	88.3495	88.3495	88.3495	87.3786	87.3786	87.3786	87.3786	87.3786	87.3786
RU486		100	100	100	100	100	100	100	100	100	100	100	100	99.2366	99.2366	96.9466	96.9466	96.9466	96.9466	96.9466	96.9466	96.9466	96.9466	96.9466	96.9466	96.9466	96.9466	96.9466	96.1832	94.6565	94.6565	93.8931	93.8931	93.8931	93.8931	93.1298	93.1298	93.1298	93.1298	93.1298	93.1298	93.1298	92.3664	92.3664	92.3664	91.6031	91.6031	91.6031	91.6031
Figure 3f
Intestine-specific adult-onset expression of CG1461 RNAi does not affect lifespan in females.
8-9 replicates/condition, combined
Days		1	2	3	4	5	6	7	8	9	10	11	12	13	14	15	16	17	18	19	20	21	22	23	24	25	26	27	28	29	30	31	32	33	34	35	36	37	38	39	40	41	42	43	44	45	46	47	48
EtOH		0	0	0	0	0	0	0	0	0	0	0	0	0	0	0	0	0	0	1	0	0	0	0	0	0	1	0	1	0	0	0	1	0	1	0	0	0	0	0	1	0	0	1	0	0	0	0	0
RU486		0	0	0	0	0	0	0	0	0	0	0	0	0	0	0	0	2	0	0	0	0	0	0	0	0	0	0	0	0	0	0	0	0	0	1	0	0	0	0	0	0	0	0	1	0	0	0	0
Days		1	2	3	4	5	6	7	8	9	10	11	12	13	14	15	16	17	18	19	20	21	22	23	24	25	26	27	28	29	30	31	32	33	34	35	36	37	38	39	40	41	42	43	44	45	46	47	48
EtOH		197	197	197	197	197	197	197	197	197	197	197	197	197	197	197	197	197	197	197	196	196	196	196	196	196	196	195	195	194	194	194	194	193	193	192	192	192	192	192	192	191	191	191	190	190	190	190	190
RU486		149	149	149	149	149	149	149	149	149	149	149	149	149	149	149	149	149	147	147	147	147	147	147	147	147	147	147	147	147	147	147	147	147	147	147	146	146	146	146	146	146	146	146	146	145	145	145	145
Days		1	2	3	4	5	6	7	8	9	10	11	12	13	14	15	16	17	18	19	20	21	22	23	24	25	26	27	28	29	30	31	32	33	34	35	36	37	38	39	40	41	42	43	44	45	46	47	48
EtOH		100	100	100	100	100	100	100	100	100	100	100	100	100	100	100	100	100	100	100	99.4924	99.4924	99.4924	99.4924	99.4924	99.4924	99.4924	98.9848	98.9848	98.4772	98.4772	98.4772	98.4772	97.9695	97.9695	97.4619	97.4619	97.4619	97.4619	97.4619	97.4619	96.9543	96.9543	96.9543	96.4467	96.4467	96.4467	96.4467	96.4467
RU486		100	100	100	100	100	100	100	100	100	100	100	100	100	100	100	100	100	98.6577	98.6577	98.6577	98.6577	98.6577	98.6577	98.6577	98.6577	98.6577	98.6577	98.6577	98.6577	98.6577	98.6577	98.6577	98.6577	98.6577	98.6577	97.9866	97.9866	97.9866	97.9866	97.9866	97.9866	97.9866	97.9866	97.9866	97.3154	97.3154	97.3154	97.3154
Figure 3g
Neuronal-specific adult-onset expression of CG1461 RNAi -1 increases lifespan in females. p < 0.0001.
10 replicates/condition, combined
Days		1	2	3	4	5	6	7	8	9	10	11	12	13	14	15	16	17	18	19	20	21	22	23	24	25	26	27	28	29	30	31	32	33	34	35	36	37	38	39	40	41	42	43	44	45	46	47	48
EtOH		0	0	0	0	0	0	0	0	0	0	0	0	0	0	0	0	0	0	0	0	0	0	0	0	0	0	0	0	0	0	0	0	0	0	0	0	0	0	0	0	0	0	0	0	0	0	0	0
RU486		0	0	0	0	0	0	0	0	1	0	0	0	0	0	0	0	0	0	0	0	0	0	0	0	0	0	0	0	0	0	0	0	0	0	0	0	0	0	0	0	0	0	0	0	0	0	0	0
Days		1	2	3	4	5	6	7	8	9	10	11	12	13	14	15	16	17	18	19	20	21	22	23	24	25	26	27	28	29	30	31	32	33	34	35	36	37	38	39	40	41	42	43	44	45	46	47	48
EtOH		246	246	246	246	246	246	246	246	246	246	246	246	246	246	246	246	246	246	246	246	246	246	246	246	246	246	246	246	246	246	246	246	246	246	246	246	246	246	246	246	246	246	246	246	246	246	246	246
RU486		250	250	250	250	250	250	250	250	250	249	249	249	249	249	249	249	249	249	249	249	249	249	249	249	249	249	249	249	249	249	249	249	249	249	249	249	249	249	249	249	249	249	249	249	249	249	249	249
Days		1	2	3	4	5	6	7	8	9	10	11	12	13	14	15	16	17	18	19	20	21	22	23	24	25	26	27	28	29	30	31	32	33	34	35	36	37	38	39	40	41	42	43	44	45	46	47	48
EtOH		100	100	100	100	100	100	100	100	100	100	100	100	100	100	100	100	100	100	100	100	100	100	100	100	100	100	100	100	100	100	100	100	100	100	100	100	100	100	100	100	100	100	100	100	100	100	100	100
RU486		100	100	100	100	100	100	100	100	100	99.6	99.6	99.6	99.6	99.6	99.6	99.6	99.6	99.6	99.6	99.6	99.6	99.6	99.6	99.6	99.6	99.6	99.6	99.6	99.6	99.6	99.6	99.6	99.6	99.6	99.6	99.6	99.6	99.6	99.6	99.6	99.6	99.6	99.6	99.6	99.6	99.6	99.6	99.6
Figure 3h
Neuronal-specific adult-onset expression of CG1461 RNAi -2 increases lifespan in females. p < 0.0001.
9-10 replicates/condition, combined
Days		1	2	3	4	5	6	7	8	9	10	11	12	13	14	15	16	17	18	19	20	21	22	23	24	25	26	27	28	29	30	31	32	33	34	35	36	37	38	39	40	41	42	43	44	45	46	47	48
EtOH		0	0	0	0	0	0	0	0	0	0	0	0	1	0	0	0	0	0	0	1	0	0	0	1	0	0	0	0	2	0	0	0	1	2	0	0	0	0	0	0	1	0	1	0	0	1	0	0
RU486		0	0	0	0	0	0	0	0	0	0	0	0	0	0	0	0	0	0	0	0	0	0	0	0	0	0	0	0	0	0	0	0	0	1	0	0	0	0	0	1	0	0	0	0	0	0	0	0
Days		1	2	3	4	5	6	7	8	9	10	11	12	13	14	15	16	17	18	19	20	21	22	23	24	25	26	27	28	29	30	31	32	33	34	35	36	37	38	39	40	41	42	43	44	45	46	47	48
EtOH		239	239	239	239	239	239	239	239	239	239	239	239	239	238	238	238	238	238	238	238	237	237	237	237	236	236	236	236	236	234	234	234	234	233	231	231	231	231	231	231	231	230	230	229	229	229	228	228
RU486		222	222	222	222	222	222	222	222	222	222	222	222	222	222	222	222	222	222	222	222	222	222	222	222	222	222	222	222	222	222	222	222	222	222	221	221	221	221	221	221	220	220	220	220	220	220	220	220
Days		1	2	3	4	5	6	7	8	9	10	11	12	13	14	15	16	17	18	19	20	21	22	23	24	25	26	27	28	29	30	31	32	33	34	35	36	37	38	39	40	41	42	43	44	45	46	47	48
EtOH		100	100	100	100	100	100	100	100	100	100	100	100	100	99.5816	99.5816	99.5816	99.5816	99.5816	99.5816	99.5816	99.1632	99.1632	99.1632	99.1632	98.7448	98.7448	98.7448	98.7448	98.7448	97.9079	97.9079	97.9079	97.9079	97.4895	96.6527	96.6527	96.6527	96.6527	96.6527	96.6527	96.6527	96.2343	96.2343	95.8159	95.8159	95.8159	95.3975	95.3975
RU486		100	100	100	100	100	100	100	100	100	100	100	100	100	100	100	100	100	100	100	100	100	100	100	100	100	100	100	100	100	100	100	100	100	100	99.5495	99.5495	99.5495	99.5495	99.5495	99.5495	99.0991	99.0991	99.0991	99.0991	99.0991	99.0991	99.0991	99.0991
Figure 3i
Neuronal-specific adult-onset expression of CG1461 RNAi -1,2, and 3 increases lifespan in females. p < 0.0001
5 replicates/condition, combined
Days		1	2	3	4	5	6	7	8	9	10	11	12	13	14	15	16	17	18	19	20	21	22	23	24	25	26	27	28	29	30	31	32	33	34	35	36	37	38	39	40	41	42	43	44	45	46	47	48
no RNAi		0	0	0	0	0	0	0	0	0	0	0	0	0	1	0	0	0	6	0	0	5	0	0	23	0	0	25	0	0	14	0	0	21	0	0	15	0	0	9	0	2	0	0	5	0	0	1	0
Cont sh		0	0	0	0	0	0	0	0	0	0	0	0	0	1	0	0	0	6	0	0	11	0	0	24	0	0	18	0	0	13	0	0	15	0	0	30	0	0	1	2	0	0	0	0	0	0	0	0
TAT sh-1		0	0	0	0	0	0	0	0	0	0	0	0	0	0	0	0	0	0	0	0	0	0	0	1	0	0	4	0	0	19	0	0	34	0	0	42	0	0	12	0	5	0	0	5	0	0	0	0
TAT sh-2		0	0	0	0	0	0	0	0	0	0	0	0	0	0	0	0	0	2	0	0	1	0	0	4	0	0	3	0	0	8	0	0	16	0	0	36	0	0	21	0	7	1	0	5	0	0	1	0
TAT sh-3		0	0	0	0	0	0	0	0	0	0	0	0	0	0	0	0	0	0	0	0	1	0	0	2	0	0	7	0	0	10	0	0	30	0	0	37	0	0	24	0	8	2	0	2	0	0	0	0
Days		1	2	3	4	5	6	7	8	9	10	11	12	13	14	15	16	17	18	19	20	21	22	23	24	25	26	27	28	29	30	31	32	33	34	35	36	37	38	39	40	41	42	43	44	45	46	47	48
no RNAi		127	127	127	127	127	127	127	127	127	127	127	127	127	127	126	126	126	126	120	120	120	115	115	115	92	92	92	67	67	67	53	53	53	32	32	32	17	17	17	8	8	6	6	6	1	1	1	0
Cont sh		121	121	121	121	121	121	121	121	121	121	121	121	121	121	120	120	120	120	114	114	114	103	103	103	79	79	79	61	61	61	48	48	48	33	33	33	3	3	3	2	0	0	0	0	0	0	0	0
TAT sh-1		122	122	122	122	122	122	122	122	122	122	122	122	122	122	122	122	122	122	122	122	122	122	122	122	121	121	121	117	117	117	98	98	98	64	64	64	22	22	22	10	10	5	5	5	0	0	0	0
TAT sh-2		105	105	105	105	105	105	105	105	105	105	105	105	105	105	105	105	105	105	103	103	103	102	102	102	98	98	98	95	95	95	87	87	87	71	71	71	35	35	35	14	14	7	6	6	1	1	1	0
TAT sh-3		123	123	123	123	123	123	123	123	123	123	123	123	123	123	123	123	123	123	123	123	123	122	122	122	120	120	120	113	113	113	103	103	103	73	73	73	36	36	36	12	12	4	2	2	0	0	0	0
Days		1	2	3	4	5	6	7	8	9	10	11	12	13	14	15	16	17	18	19	20	21	22	23	24	25	26	27	28	29	30	31	32	33	34	35	36	37	38	39	40	41	42	43	44	45	46	47	48
no RNAi		100	100	100	100	100	100	100	100	100	100	100	100	100	100	99.2126	99.2126	99.2126	99.2126	94.4882	94.4882	94.4882	90.5512	90.5512	90.5512	72.4409	72.4409	72.4409	52.7559	52.7559	52.7559	41.7323	41.7323	41.7323	25.1969	25.1969	25.1969	13.3858	13.3858	13.3858	6.29921	6.29921	4.72441	4.72441	4.72441	0.787402	0.787402	0.787402	0
Cont sh		100	100	100	100	100	100	100	100	100	100	100	100	100	100	99.1736	99.1736	99.1736	99.1736	94.2149	94.2149	94.2149	85.124	85.124	85.124	65.2893	65.2893	65.2893	50.4132	50.4132	50.4132	39.6694	39.6694	39.6694	27.2727	27.2727	27.2727	2.47934	2.47934	2.47934	1.65289	0	0	0	0	0	0	0	0
TAT sh-1		100	100	100	100	100	100	100	100	100	100	100	100	100	100	100	100	100	100	100	100	100	100	100	100	99.1803	99.1803	99.1803	95.9016	95.9016	95.9016	80.3279	80.3279	80.3279	52.459	52.459	52.459	18.0328	18.0328	18.0328	8.19672	8.19672	4.09836	4.09836	4.09836	0	0	0	0
TAT sh-2		100	100	100	100	100	100	100	100	100	100	100	100	100	100	100	100	100	100	98.0952	98.0952	98.0952	97.1429	97.1429	97.1429	93.3333	93.3333	93.3333	90.4762	90.4762	90.4762	82.8571	82.8571	82.8571	67.619	67.619	67.619	33.3333	33.3333	33.3333	13.3333	13.3333	6.66667	5.71429	5.71429	0.952381	0.952381	0.952381	0
TAT sh-3		100	100	100	100	100	100	100	100	100	100	100	100	100	100	100	100	100	100	100	100	100	99.187	99.187	99.187	97.561	97.561	97.561	91.8699	91.8699	91.8699	83.7398	83.7398	83.7398	59.3496	59.3496	59.3496	29.2683	29.2683	29.2683	9.7561	9.7561	3.25203	1.62602	1.62602	0	0	0	0
Supplementary Figure 2a
Lifespan of male (A) wild-type and CG1461-deficient flies (both backcrossed to wild-type OreR flies) fed with the range of tyrosine concentrations (1X = 0.5g/L).
4-5 replicates/condition for treatments, combined
Days	1	2	3	4	5	6	7	8	9	10	11	12	13	14	15	16	17	18	19	20	21	22	23	24	25	26	27	28	29	30	31	32	33	34	35	36	37	38	39	40	41	42	43	44	45	46	47	48	49
wt	0	0	0	0	0	0	0	0	3	0	0	0	0	1	1	2	1	0	2	0	0	0	1	0	0	0	0	0	0	0	0	0	2	0	1	0	0	0	0	0	1	0	0	0	0	0	3	2	0
wt + TYR 1X	0	0	0	0	0	0	0	0	3	0	0	1	0	0	0	0	0	0	2	0	0	0	0	0	0	1	0	0	0	1	1	0	3	0	0	1	0	0	0	0	3	2	0	0	3	0	1	1	2
wt + TYR 2.5X	0	0	0	0	0	0	0	0	5	0	0	0	0	0	0	1	0	0	0	0	0	0	0	0	0	0	2	0	0	0	0	0	1	0	0	1	1	0	0	2	1	0	0	0	1	0	7	1	3
wt + TYR 5X	0	0	0	0	0	0	0	0	3	0	0	0	0	0	0	0	0	0	0	0	0	0	0	0	0	0	1	0	2	1	3	0	2	9	1	2	1	2	0	2	2	5	0	0	0	0	0	0	4
wt + TYR 10X	0	0	0	0	0	0	0	0	1	0	0	1	1	0	1	1	1	0	2	0	0	1	0	0	0	0	1	0	0	1	0	0	1	2	1	0	0	0	0	1	0	1	0	0	3	0	2	1	0
mut	0	0	0	0	0	0	0	0	4	0	0	0	0	0	0	0	0	0	2	0	2	1	0	0	0	1	0	2	2	6	0	0	6	1	2	0	3	2	0	4	0	0	1	5	1	0	11	0	5
mut + TYR 1X	0	0	0	0	0	0	0	0	2	0	0	0	1	0	0	1	2	0	2	2	1	2	1	0	0	5	5	2	3	4	4	0	8	0	7	0	8	0	0	10	2	4	0	3	2	0	12	0	3
mut + TYR 2.5X	0	0	0	0	0	0	0	0	2	0	0	0	0	0	0	1	1	0	6	7	3	7	5	4	0	21	4	6	0	6	0	0	12	0	7	0	0	0	0	3	0	1	0	1	0	0	0	0	0
mut + TYR 5X	0	0	0	0	0	0	0	0	3	0	0	1	0	0	3	7	0	0	23	11	23	6	8	3	0	1	0	4	0	0	0	0	0	0	0	0	0	0	0	0	0	0	0	0	0	0	0	0	0
mut + TYR 10X	0	0	0	0	0	0	0	0	2	0	0	0	0	0	6	4	3	0	25	7	13	7	20	1	0	9	0	1	0	0	0	0	0	0	0	0	0	0	0	0	0	0	0	0	0	0	0	0	0
Days	1	2	3	4	5	6	7	8	9	10	11	12	13	14	15	16	17	18	19	20	21	22	23	24	25	26	27	28	29	30	31	32	33	34	35	36	37	38	39	40	41	42	43	44	45	46	47	48	49
wt	78	78	78	78	78	78	78	78	78	75	75	75	75	75	74	73	71	70	70	68	68	68	68	67	67	67	67	67	67	67	67	67	67	65	65	64	64	64	64	64	64	63	63	63	63	63	63	60	58
wt + TYR 1X	97	97	97	97	97	97	97	97	97	94	94	94	93	93	93	93	93	93	93	91	91	91	91	91	91	91	90	90	90	90	89	88	88	85	85	85	84	84	84	84	84	81	79	79	79	76	76	75	74
wt + TYR 2.5X	92	92	92	92	92	92	92	92	92	87	87	87	87	87	87	87	86	86	86	86	86	86	86	86	86	86	86	84	84	84	84	84	84	83	83	83	82	81	81	81	79	78	78	78	78	77	77	70	69
wt + TYR 5X	103	103	103	103	103	103	103	103	103	100	100	100	100	100	100	100	100	100	100	100	100	100	100	100	100	100	100	99	99	97	96	93	93	91	82	81	79	78	76	76	74	72	67	67	67	67	67	67	67
wt + TYR 10X	93	93	93	93	93	93	93	93	93	92	92	92	91	90	90	89	88	87	87	85	85	85	84	84	84	84	84	83	83	83	82	82	82	81	79	78	78	78	78	78	77	77	76	76	76	73	73	71	70
mut	100	100	100	100	100	100	100	100	100	96	96	96	96	96	96	96	96	96	96	94	94	92	91	91	91	91	90	90	88	86	80	80	80	74	73	71	71	68	66	66	62	62	62	61	56	55	55	44	44
mut + TYR 1X	100	100	100	100	100	100	100	100	100	98	98	98	98	97	97	97	96	94	94	92	90	89	87	86	86	86	81	76	74	71	67	63	63	55	55	48	48	40	40	40	30	28	24	24	21	19	19	7	7
mut + TYR 2.5X	97	97	97	97	97	97	97	97	97	95	95	95	95	95	95	95	94	93	93	87	80	77	70	65	61	61	40	36	30	30	24	24	24	12	12	5	5	5	5	5	2	2	1	1	0	0	0	0	0
mut + TYR 5X	93	93	93	93	93	93	93	93	93	90	90	90	89	89	89	86	79	79	79	56	45	22	16	8	5	5	4	4	0	0	0	0	0	0	0	0	0	0	0	0	0	0	0	0	0	0	0	0	0
mut + TYR 10X	98	98	98	98	98	98	98	98	98	96	96	96	96	96	96	90	86	83	83	58	51	38	31	11	10	10	1	1	0	0	0	0	0	0	0	0	0	0	0	0	0	0	0	0	0	0	0	0	0
Days	1	2	3	4	5	6	7	8	9	10	11	12	13	14	15	16	17	18	19	20	21	22	23	24	25	26	27	28	29	30	31	32	33	34	35	36	37	38	39	40	41	42	43	44	45	46	47	48	49
wt	100	100	100	100	100	100	100	100	100	96.1538	96.1538	96.1538	96.1538	96.1538	94.8718	93.5897	91.0256	89.7436	89.7436	87.1795	87.1795	87.1795	87.1795	85.8974	85.8974	85.8974	85.8974	85.8974	85.8974	85.8974	85.8974	85.8974	85.8974	83.3333	83.3333	82.0513	82.0513	82.0513	82.0513	82.0513	82.0513	80.7692	80.7692	80.7692	80.7692	80.7692	80.7692	76.9231	74.359
wt + TYR 1X	100	100	100	100	100	100	100	100	100	96.9072	96.9072	96.9072	95.8763	95.8763	95.8763	95.8763	95.8763	95.8763	95.8763	93.8144	93.8144	93.8144	93.8144	93.8144	93.8144	93.8144	92.7835	92.7835	92.7835	92.7835	91.7526	90.7216	90.7216	87.6289	87.6289	87.6289	86.5979	86.5979	86.5979	86.5979	86.5979	83.5052	81.4433	81.4433	81.4433	78.3505	78.3505	77.3196	76.2887
wt + TYR 2.5X	100	100	100	100	100	100	100	100	100	94.5652	94.5652	94.5652	94.5652	94.5652	94.5652	94.5652	93.4783	93.4783	93.4783	93.4783	93.4783	93.4783	93.4783	93.4783	93.4783	93.4783	93.4783	91.3043	91.3043	91.3043	91.3043	91.3043	91.3043	90.2174	90.2174	90.2174	89.1304	88.0435	88.0435	88.0435	85.8696	84.7826	84.7826	84.7826	84.7826	83.6957	83.6957	76.087	75
wt + TYR 5X	100	100	100	100	100	100	100	100	100	97.0874	97.0874	97.0874	97.0874	97.0874	97.0874	97.0874	97.0874	97.0874	97.0874	97.0874	97.0874	97.0874	97.0874	97.0874	97.0874	97.0874	97.0874	96.1165	96.1165	94.1748	93.2039	90.2913	90.2913	88.3495	79.6117	78.6408	76.699	75.7282	73.7864	73.7864	71.8447	69.9029	65.0485	65.0485	65.0485	65.0485	65.0485	65.0485	65.0485
wt + TYR 10X	100	100	100	100	100	100	100	100	100	98.9247	98.9247	98.9247	97.8495	96.7742	96.7742	95.6989	94.6237	93.5484	93.5484	91.3978	91.3978	91.3978	90.3226	90.3226	90.3226	90.3226	90.3226	89.2473	89.2473	89.2473	88.172	88.172	88.172	87.0968	84.9462	83.871	83.871	83.871	83.871	83.871	82.7957	82.7957	81.7204	81.7204	81.7204	78.4946	78.4946	76.3441	75.2688
mut	100	100	100	100	100	100	100	100	100	96	96	96	96	96	96	96	96	96	96	94	94	92	91	91	91	91	90	90	88	86	80	80	80	74	73	71	71	68	66	66	62	62	62	61	56	55	55	44	44
mut + TYR 1X	100	100	100	100	100	100	100	100	100	98	98	98	98	97	97	97	96	94	94	92	90	89	87	86	86	86	81	76	74	71	67	63	63	55	55	48	48	40	40	40	30	28	24	24	21	19	19	7	7
mut + TYR 2.5X	100	100	100	100	100	100	100	100	100	97.9381	97.9381	97.9381	97.9381	97.9381	97.9381	97.9381	96.9072	95.8763	95.8763	89.6907	82.4742	79.3814	72.1649	67.0103	62.8866	62.8866	41.2371	37.1134	30.9278	30.9278	24.7423	24.7423	24.7423	12.3711	12.3711	5.15464	5.15464	5.15464	5.15464	5.15464	2.06186	2.06186	1.03093	1.03093	0	0	0	0	0
mut + TYR 5X	100	100	100	100	100	100	100	100	100	96.7742	96.7742	96.7742	95.6989	95.6989	95.6989	92.4731	84.9462	84.9462	84.9462	60.2151	48.3871	23.6559	17.2043	8.60215	5.37634	5.37634	4.30108	4.30108	0	0	0	0	0	0	0	0	0	0	0	0	0	0	0	0	0	0	0	0	0
mut + TYR 10X	100	100	100	100	100	100	100	100	100	97.9592	97.9592	97.9592	97.9592	97.9592	97.9592	91.8367	87.7551	84.6939	84.6939	59.1837	52.0408	38.7755	31.6327	11.2245	10.2041	10.2041	1.02041	1.02041	0	0	0	0	0	0	0	0	0	0	0	0	0	0	0	0	0	0	0	0	0
Supplementary Figure 2b
Lifespan of female (B) wild-type and CG1461-deficient flies (both backcrossed to wild-type OreR flies) fed with the range of tyrosine concentrations (1X = 0.5g/L).
4-5 replicates/condition for treatments, combined
Days	1	2	3	4	5	6	7	8	9	10	11	12	13	14	15	16	17	18	19	20	21	22	23	24	25	26	27	28	29	30	31	32	33	34	35	36	37	38	39	40	41	42	43	44	45	46	47	48	49
wt	0	0	0	0	0	0	0	0	2	0	0	0	0	1	0	2	1	0	1	0	1	1	1	0	0	0	0	1	0	1	0	0	1	0	2	0	1	0	0	1	0	0	1	1	1	0	0	0	0
wt + TYR 1X	0	0	0	0	0	0	0	0	0	0	0	0	0	0	0	0	0	0	2	0	1	0	0	0	0	1	0	0	0	1	0	0	0	1	1	0	0	0	0	0	0	0	0	0	0	0	1	0	0
wt + TYR 2.5X	0	0	0	0	0	0	0	0	2	0	0	0	0	0	0	0	0	0	1	0	1	1	1	0	0	1	0	0	0	1	0	0	1	1	0	0	0	0	0	1	0	0	0	1	0	0	1	1	0
wt + TYR 5X	0	0	0	0	0	0	0	0	4	0	0	0	1	0	0	1	0	0	1	0	1	0	0	0	0	0	0	1	3	0	2	0	1	5	1	6	3	4	0	2	0	0	0	0	0	0	2	0	15
wt + TYR 10X	0	0	0	0	0	0	0	0	2	0	0	0	0	1	0	2	0	0	2	1	6	2	8	8	0	9	9	1	3	1	0	0	4	0	3	0	1	0	0	2	0	2	0	4	0	0	4	0	0
mut	0	0	0	0	0	0	0	0	1	0	0	0	1	1	0	2	0	0	2	0	0	0	0	0	0	0	0	1	0	2	0	0	2	0	3	1	1	0	0	0	1	0	0	2	2	0	4	2	4
mut + TYR 1X	0	0	0	0	0	0	0	0	0	0	0	0	0	0	0	2	0	0	3	1	2	4	2	2	0	7	6	11	3	3	2	0	6	5	6	0	8	0	0	8	1	2	1	1	0	0	5	0	2
mut + TYR 2.5X	0	0	0	0	0	0	0	0	1	0	0	0	0	0	3	0	5	0	3	3	7	5	4	3	0	24	0	9	0	5	0	0	3	0	4	2	4	0	0	6	0	4	0	1	0	0	1	0	1
mut + TYR 5X	0	0	0	0	0	0	0	0	2	0	0	0	0	1	7	41	10	0	27	4	3	1	1	0	0	0	0	0	0	1	0	0	1	0	0	0	0	0	0	0	0	0	0	0	0	0	0	0	0
mut + TYR 10X	0	0	0	0	0	0	0	0	0	0	0	1	6	6	12	38	7	0	28	0	2	0	0	0	0	2	0	0	0	0	0	0	0	0	0	0	0	0	0	0	0	0	0	0	0	0	0	0	0
Days	1	2	3	4	5	6	7	8	9	10	11	12	13	14	15	16	17	18	19	20	21	22	23	24	25	26	27	28	29	30	31	32	33	34	35	36	37	38	39	40	41	42	43	44	45	46	47	48	49
wt	88	88	88	88	88	88	88	88	88	86	86	86	86	86	85	85	83	82	82	81	81	80	79	78	78	78	78	78	77	77	76	76	76	75	75	73	73	72	72	72	71	71	71	70	69	68	68	68	68
wt + TYR 1X	75	75	75	75	75	75	75	75	75	75	75	75	75	75	75	75	75	75	75	73	73	72	72	72	72	72	71	71	71	71	70	70	70	70	69	68	68	68	68	68	68	68	68	68	68	68	68	67	67
wt + TYR 2.5X	98	98	98	98	98	98	98	98	98	96	96	96	96	96	96	96	96	96	96	95	95	94	93	92	92	92	91	91	91	91	90	90	90	89	88	88	88	88	88	88	87	87	87	87	86	86	86	85	84
wt + TYR 5X	98	98	98	98	98	98	98	98	98	94	94	94	94	93	93	93	92	92	92	91	91	90	90	90	90	90	90	90	89	86	86	84	84	83	78	77	71	68	64	64	62	62	62	62	62	62	62	60	60
wt + TYR 10X	103	103	103	103	103	103	103	103	103	101	101	101	101	101	100	100	98	98	98	96	95	89	87	79	71	71	62	53	52	49	48	48	48	44	44	41	41	40	40	40	38	38	36	36	32	32	32	28	28
mut	105	105	105	105	105	105	105	105	105	104	104	104	104	103	102	102	100	100	100	98	98	98	98	98	98	98	98	98	97	97	95	95	95	93	93	90	89	88	88	88	88	87	87	87	85	83	83	79	77
mut + TYR 1X	103	103	103	103	103	103	103	103	103	103	103	103	103	103	103	103	101	101	101	98	97	95	91	89	87	87	80	74	63	60	57	55	55	49	44	38	38	30	30	30	22	21	19	18	17	17	17	12	12
mut + TYR 2.5X	98	98	98	98	98	98	98	98	98	97	97	97	97	97	97	94	94	89	89	86	83	76	71	67	64	64	40	40	31	31	26	26	26	23	23	19	17	13	13	13	7	7	3	3	2	2	2	1	1
mut + TYR 5X	99	99	99	99	99	99	99	99	99	97	97	97	97	97	96	89	48	38	38	11	7	4	3	2	2	2	2	2	2	2	1	1	1	0	0	0	0	0	0	0	0	0	0	0	0	0	0	0	0
mut + TYR 10X	102	102	102	102	102	102	102	102	102	102	102	102	101	95	89	77	39	32	32	4	4	2	2	2	2	2	0	0	0	0	0	0	0	0	0	0	0	0	0	0	0	0	0	0	0	0	0	0	0
Days	1	2	3	4	5	6	7	8	9	10	11	12	13	14	15	16	17	18	19	20	21	22	23	24	25	26	27	28	29	30	31	32	33	34	35	36	37	38	39	40	41	42	43	44	45	46	47	48	49
wt	100	100	100	100	100	100	100	100	100	97.7273	97.7273	97.7273	97.7273	97.7273	96.5909	96.5909	94.3182	93.1818	93.1818	92.0455	92.0455	90.9091	89.7727	88.6364	88.6364	88.6364	88.6364	88.6364	87.5	87.5	86.3636	86.3636	86.3636	85.2273	85.2273	82.9545	82.9545	81.8182	81.8182	81.8182	80.6818	80.6818	80.6818	79.5455	78.4091	77.2727	77.2727	77.2727	77.2727
wt + TYR 1X	100	100	100	100	100	100	100	100	100	100	100	100	100	100	100	100	100	100	100	97.3333	97.3333	96	96	96	96	96	94.6667	94.6667	94.6667	94.6667	93.3333	93.3333	93.3333	93.3333	92	90.6667	90.6667	90.6667	90.6667	90.6667	90.6667	90.6667	90.6667	90.6667	90.6667	90.6667	90.6667	89.3333	89.3333
wt + TYR 2.5X	100	100	100	100	100	100	100	100	100	97.9592	97.9592	97.9592	97.9592	97.9592	97.9592	97.9592	97.9592	97.9592	97.9592	96.9388	96.9388	95.9184	94.898	93.8776	93.8776	93.8776	92.8571	92.8571	92.8571	92.8571	91.8367	91.8367	91.8367	90.8163	89.7959	89.7959	89.7959	89.7959	89.7959	89.7959	88.7755	88.7755	88.7755	88.7755	87.7551	87.7551	87.7551	86.7347	85.7143
wt + TYR 5X	100	100	100	100	100	100	100	100	100	95.9184	95.9184	95.9184	95.9184	94.898	94.898	94.898	93.8776	93.8776	93.8776	92.8571	92.8571	91.8367	91.8367	91.8367	91.8367	91.8367	91.8367	91.8367	90.8163	87.7551	87.7551	85.7143	85.7143	84.6939	79.5918	78.5714	72.449	69.3878	65.3061	65.3061	63.2653	63.2653	63.2653	63.2653	63.2653	63.2653	63.2653	61.2245	61.2245
wt + TYR 10X	100	100	100	100	100	100	100	100	100	98.0583	98.0583	98.0583	98.0583	98.0583	97.0874	97.0874	95.1456	95.1456	95.1456	93.2039	92.233	86.4078	84.466	76.699	68.932	68.932	60.1942	51.4563	50.4854	47.5728	46.6019	46.6019	46.6019	42.7184	42.7184	39.8058	39.8058	38.835	38.835	38.835	36.8932	36.8932	34.9515	34.9515	31.068	31.068	31.068	27.1845	27.1845
mut	100	100	100	100	100	100	100	100	100	99.0476	99.0476	99.0476	99.0476	98.0952	97.1429	97.1429	95.2381	95.2381	95.2381	93.3333	93.3333	93.3333	93.3333	93.3333	93.3333	93.3333	93.3333	93.3333	92.381	92.381	90.4762	90.4762	90.4762	88.5714	88.5714	85.7143	84.7619	83.8095	83.8095	83.8095	83.8095	82.8571	82.8571	82.8571	80.9524	79.0476	79.0476	75.2381	73.3333
mut + TYR 1X	100	100	100	100	100	100	100	100	100	100	100	100	100	100	100	100	98.0583	98.0583	98.0583	95.1456	94.1748	92.233	88.3495	86.4078	84.466	84.466	77.6699	71.8447	61.165	58.2524	55.3398	53.3981	53.3981	47.5728	42.7184	36.8932	36.8932	29.1262	29.1262	29.1262	21.3592	20.3883	18.4466	17.4757	16.5049	16.5049	16.5049	11.6505	11.6505
mut + TYR 2.5X	100	100	100	100	100	100	100	100	100	98.9796	98.9796	98.9796	98.9796	98.9796	98.9796	95.9184	95.9184	90.8163	90.8163	87.7551	84.6939	77.551	72.449	68.3673	65.3061	65.3061	40.8163	40.8163	31.6327	31.6327	26.5306	26.5306	26.5306	23.4694	23.4694	19.3878	17.3469	13.2653	13.2653	13.2653	7.14286	7.14286	3.06122	3.06122	2.04082	2.04082	2.04082	1.02041	1.02041
mut + TYR 5X	100	100	100	100	100	100	100	100	100	97.9798	97.9798	97.9798	97.9798	97.9798	96.9697	89.899	48.4848	38.3838	38.3838	11.1111	7.07071	4.0404	3.0303	2.0202	2.0202	2.0202	2.0202	2.0202	2.0202	2.0202	1.0101	1.0101	1.0101	0	0	0	0	0	0	0	0	0	0	0	0	0	0	0	0
mut + TYR 10X	100	100	100	100	100	100	100	100	100	100	100	100	99.0196	93.1373	87.2549	75.4902	38.2353	31.3725	31.3725	3.92157	3.92157	1.96078	1.96078	1.96078	1.96078	1.96078	0	0	0	0	0	0	0	0	0	0	0	0	0	0	0	0	0	0	0	0	0	0	0
Supplementary Figure 3c
Feeding adult male OreR flies with 5 mM Octopamine, L-DOPA, or Tyramine starting day 14.
5 replicates/condition for treatments, 10 replicates for control flies, combined
Days	1	2	3	4	5	6	7	8	9	10	11	12	13	14	15	16	17	18	19	20	21	22	23	24	25	26	27	28	29	30	31	32	33	34	35	36	37	38	39	40	41	42	43	44	45	46	47	48	49
Contr	0	0	0	0	0	0	0	0	0	0	0	13	0	0	8	0	0	8	0	0	8	0	0	7	0	0	8	0	0	1	0	0	15	0	0	25	0	0	40	0	0	28	0	0	23	0	0	24	0
Octopamine	0	0	0	0	0	0	0	0	0	0	0	6	0	0	3	0	0	2	0	0	6	0	0	8	0	0	8	0	0	9	0	0	13	0	0	3	0	0	3	0	0	6	0	0	8	0	0	12	0
L-DOPA	0	0	0	0	0	0	0	0	0	0	0	4	0	0	8	0	0	2	0	0	4	0	0	7	0	0	4	0	0	2	0	0	17	0	0	9	0	0	21	0	0	13	0	0	9	0	0	7	0
Tyramine	0	0	0	0	0	0	0	0	0	0	0	2	0	0	0	0	0	4	0	0	7	0	0	5	0	0	3	0	0	14	0	0	7	0	0	5	0	0	10	0	0	25	0	0	13	0	0	6	0
Days	1	2	3	4	5	6	7	8	9	10	11	12	13	14	15	16	17	18	19	20	21	22	23	24	25	26	27	28	29	30	31	32	33	34	35	36	37	38	39	40	41	42	43	44	45	46	47	48	49
Contr	250	250	250	250	250	250	250	250	250	250	250	250	237	237	237	229	229	229	221	221	221	213	213	213	206	206	206	198	198	198	197	197	197	182	182	182	157	157	157	117	117	117	89	89	89	66	66	66	42
Octopamine	129	129	129	129	129	129	129	129	129	129	129	129	123	123	123	120	120	120	118	118	118	112	112	112	104	104	104	96	96	96	87	87	87	74	74	74	71	71	71	68	68	68	62	62	62	54	54	54	42
L-DOPA	133	133	133	133	133	133	133	133	133	133	133	133	129	129	129	121	121	121	119	119	119	115	115	115	108	108	108	104	104	104	102	102	102	85	85	85	76	76	76	55	55	55	42	42	42	33	33	33	26
Tyramine	132	132	132	132	132	132	132	132	132	132	132	132	130	130	130	130	130	130	126	126	126	119	119	119	114	114	114	111	111	111	97	97	97	90	90	90	85	85	85	75	75	75	50	50	50	37	37	37	31
Days	1	2	3	4	5	6	7	8	9	10	11	12	13	14	15	16	17	18	19	20	21	22	23	24	25	26	27	28	29	30	31	32	33	34	35	36	37	38	39	40	41	42	43	44	45	46	47	48	49
Contr	100	100	100	100	100	100	100	100	100	100	100	100	94.8	94.8	94.8	91.6	91.6	91.6	88.4	88.4	88.4	85.2	85.2	85.2	82.4	82.4	82.4	79.2	79.2	79.2	78.8	78.8	78.8	72.8	72.8	72.8	62.8	62.8	62.8	46.8	46.8	46.8	35.6	35.6	35.6	26.4	26.4	26.4	16.8
Octopamine	100	100	100	100	100	100	100	100	100	100	100	100	95.3488	95.3488	95.3488	93.0233	93.0233	93.0233	91.4729	91.4729	91.4729	86.8217	86.8217	86.8217	80.6202	80.6202	80.6202	74.4186	74.4186	74.4186	67.4419	67.4419	67.4419	57.3643	57.3643	57.3643	55.0388	55.0388	55.0388	52.7132	52.7132	52.7132	48.062	48.062	48.062	41.8605	41.8605	41.8605	32.5581
L-DOPA	100	100	100	100	100	100	100	100	100	100	100	100	96.9925	96.9925	96.9925	90.9774	90.9774	90.9774	89.4737	89.4737	89.4737	86.4662	86.4662	86.4662	81.203	81.203	81.203	78.1955	78.1955	78.1955	76.6917	76.6917	76.6917	63.9098	63.9098	63.9098	57.1429	57.1429	57.1429	41.3534	41.3534	41.3534	31.5789	31.5789	31.5789	24.812	24.812	24.812	19.5489
Tyramine	100	100	100	100	100	100	100	100	100	100	100	100	98.4848	98.4848	98.4848	98.4848	98.4848	98.4848	95.4545	95.4545	95.4545	90.1515	90.1515	90.1515	86.3636	86.3636	86.3636	84.0909	84.0909	84.0909	73.4848	73.4848	73.4848	68.1818	68.1818	68.1818	64.3939	64.3939	64.3939	56.8182	56.8182	56.8182	37.8788	37.8788	37.8788	28.0303	28.0303	28.0303	23.4848
Supplementary Figure 3d
Feeding adult female OreR flies with 5 mM Octopamine, L-DOPA, or Tyramine starting day 14.
5 replicates/condition for treatments, 10 replicates for control flies, combined
Days	1	2	3	4	5	6	7	8	9	10	11	12	13	14	15	16	17	18	19	20	21	22	23	24	25	26	27	28	29	30	31	32	33	34	35	36	37	38	39	40	41	42	43	44	45	46	47	48	49
Contr	0	0	0	0	0	0	0	0	0	0	0	21	0	0	24	0	0	18	0	0	9	0	0	8	0	0	14	0	0	3	0	0	8	0	0	10	0	0	13	0	0	15	0	0	14	0	0	15	0
Octopamine	0	0	0	0	0	0	0	0	0	0	0	20	0	0	6	0	0	7	0	0	14	0	0	5	0	0	1	0	0	2	0	0	2	0	0	5	0	0	2	0	0	5	0	0	1	0	0	3	0
L-DOPA	0	0	0	0	0	0	0	0	0	0	0	14	0	0	12	0	0	5	0	0	9	0	0	3	0	0	4	0	0	4	0	0	5	0	0	1	0	0	4	0	0	2	0	0	9	0	0	6	0
Tyramine	0	0	0	0	0	0	0	0	0	0	0	13	0	0	15	0	0	8	0	0	4	0	0	9	0	0	3	0	0	1	0	0	2	0	0	4	0	0	4	0	0	2	0	0	2	0	0	10	0
Days	1	2	3	4	5	6	7	8	9	10	11	12	13	14	15	16	17	18	19	20	21	22	23	24	25	26	27	28	29	30	31	32	33	34	35	36	37	38	39	40	41	42	43	44	45	46	47	48	49
Contr	265	265	265	265	265	265	265	265	265	265	265	265	244	244	244	220	220	220	202	202	202	193	193	193	185	185	185	171	171	171	168	168	168	160	160	160	150	150	150	137	137	137	122	122	122	108	108	108	93
Octopamine	131	131	131	131	131	131	131	131	131	131	131	131	111	111	111	105	105	105	98	98	98	84	84	84	79	79	79	78	78	78	76	76	76	74	74	74	69	69	69	67	67	67	62	62	62	61	61	61	58
L-DOPA	134	134	134	134	134	134	134	134	134	134	134	134	120	120	120	108	108	108	103	103	103	94	94	94	91	91	91	87	87	87	83	83	83	78	78	78	77	77	77	73	73	73	71	71	71	62	62	62	56
Tyramine	135	135	135	135	135	135	135	135	135	135	135	135	122	122	122	107	107	107	99	99	99	95	95	95	86	86	86	83	83	83	82	82	82	80	80	80	76	76	76	72	72	72	70	70	70	68	68	68	58
Days	1	2	3	4	5	6	7	8	9	10	11	12	13	14	15	16	17	18	19	20	21	22	23	24	25	26	27	28	29	30	31	32	33	34	35	36	37	38	39	40	41	42	43	44	45	46	47	48	49
Contr	100	100	100	100	100	100	100	100	100	100	100	100	92.0755	92.0755	92.0755	83.0189	83.0189	83.0189	76.2264	76.2264	76.2264	72.8302	72.8302	72.8302	69.8113	69.8113	69.8113	64.5283	64.5283	64.5283	63.3962	63.3962	63.3962	60.3774	60.3774	60.3774	56.6038	56.6038	56.6038	51.6981	51.6981	51.6981	46.0377	46.0377	46.0377	40.7547	40.7547	40.7547	35.0943
Octopamine	100	100	100	100	100	100	100	100	100	100	100	100	84.7328	84.7328	84.7328	80.1527	80.1527	80.1527	74.8092	74.8092	74.8092	64.1221	64.1221	64.1221	60.3053	60.3053	60.3053	59.542	59.542	59.542	58.0153	58.0153	58.0153	56.4885	56.4885	56.4885	52.6718	52.6718	52.6718	51.145	51.145	51.145	47.3282	47.3282	47.3282	46.5649	46.5649	46.5649	44.2748
L-DOPA	100	100	100	100	100	100	100	100	100	100	100	100	89.5522	89.5522	89.5522	80.597	80.597	80.597	76.8657	76.8657	76.8657	70.1493	70.1493	70.1493	67.9104	67.9104	67.9104	64.9254	64.9254	64.9254	61.9403	61.9403	61.9403	58.209	58.209	58.209	57.4627	57.4627	57.4627	54.4776	54.4776	54.4776	52.9851	52.9851	52.9851	46.2687	46.2687	46.2687	41.791
Tyramine	100	100	100	100	100	100	100	100	100	100	100	100	90.3704	90.3704	90.3704	79.2593	79.2593	79.2593	73.3333	73.3333	73.3333	70.3704	70.3704	70.3704	63.7037	63.7037	63.7037	61.4815	61.4815	61.4815	60.7407	60.7407	60.7407	59.2593	59.2593	59.2593	56.2963	56.2963	56.2963	53.3333	53.3333	53.3333	51.8519	51.8519	51.8519	50.3704	50.3704	50.3704	42.963
Supplementary Figure 5c
Lifespans of female (C) tubulin-Gal80ts, tubulin-Gal4 flies expressing either control RNAi or RNAi against NP15.6 fed with the range of tyrosine concentrations (1X = 0.5g/L).
3-4 replicates/condition for treatments, combined
Days	1	2	3	4	5	6	7	8	9	10	11	12	13	14	15	16	17	18	19	20	21	22	23	24	25	26	27	28	29	30	31	32	33	34	35	36	37	38	39	40	41	42	43	44	45	46	47	48	49
Cont	0	0	1	0	1	0	0	0	0	1	0	0	0	0	0	0	1	0	0	0	0	0	0	0	0	0	0	0	0	0	0	0	0	0	0	0	0	1	0	1	0	0	2	0	3	0	12	0	0
NP15.6	0	0	2	0	1	0	0	0	0	1	0	0	0	0	1	0	0	0	0	0	0	4	0	4	0	4	0	0	11	0	0	0	12	0	0	10	0	17	0	11	0	0	0	0	0	0	0	0	0
NP15.6 TYR 1X	0	0	1	0	1	0	0	0	0	0	0	0	0	0	0	0	0	0	0	0	0	0	0	1	0	4	0	0	7	0	2	0	13	0	0	12	0	10	0	13	0	0	11	0	0	0	0	0	0
NP15.6 TYR 2.5X	0	0	0	0	0	0	2	0	0	0	0	2	0	0	0	0	1	0	0	0	0	1	0	0	0	1	0	0	10	0	1	0	5	0	0	15	0	14	0	9	0	0	15	0	1	0	0	0	0
NP15.6 TYR 5X	0	0	0	0	0	0	0	0	0	0	0	0	0	0	0	0	2	0	0	0	0	9	0	3	0	1	0	0	3	0	2	0	5	0	0	12	0	11	0	12	0	0	17	0	1	0	0	0	0
NP15.6 TYR 10X	0	0	0	0	0	0	0	0	0	0	0	0	0	0	0	0	0	0	1	0	0	0	0	1	0	2	0	0	10	0	1	0	14	0	0	20	0	17	0	10	0	0	1	0	0	0	0	0	0
Days	1	2	3	4	5	6	7	8	9	10	11	12	13	14	15	16	17	18	19	20	21	22	23	24	25	26	27	28	29	30	31	32	33	34	35	36	37	38	39	40	41	42	43	44	45	46	47	48	49
Cont	75	75	75	74	74	73	73	73	73	73	72	72	72	72	72	72	72	71	71	71	71	71	71	71	71	71	71	71	71	71	71	71	71	71	71	71	71	71	70	70	69	69	69	67	67	64	64	52	52
NP15.6	78	78	78	76	76	75	75	75	75	75	74	74	74	74	74	73	73	73	73	73	73	73	69	69	65	65	61	61	61	50	50	50	50	38	38	38	28	28	11	11	0	0	0	0	0	0	0	0	0
NP15.6 TYR 1X	75	75	75	74	74	73	73	73	73	73	73	73	73	73	73	73	73	73	73	73	73	73	73	73	72	72	68	68	68	61	61	59	59	46	46	46	34	34	24	24	11	11	11	0	0	0	0	0	0
NP15.6 TYR 2.5X	77	77	77	77	77	77	77	75	75	75	75	75	73	73	73	73	73	72	72	72	72	72	71	71	71	71	70	70	70	60	60	59	59	54	54	54	39	39	25	25	16	16	16	1	1	0	0	0	0
NP15.6 TYR 5X	78	78	78	78	78	78	78	78	78	78	78	78	78	78	78	78	78	76	76	76	76	76	67	67	64	64	63	63	63	60	60	58	58	53	53	53	41	41	30	30	18	18	18	1	1	0	0	0	0
NP15.6 TYR 10X	77	77	77	77	77	77	77	77	77	77	77	77	77	77	77	77	77	77	77	76	76	76	76	76	75	75	73	73	73	63	63	62	62	48	48	48	28	28	11	11	1	1	1	0	0	0	0	0	0
Days	1	2	3	4	5	6	7	8	9	10	11	12	13	14	15	16	17	18	19	20	21	22	23	24	25	26	27	28	29	30	31	32	33	34	35	36	37	38	39	40	41	42	43	44	45	46	47	48	49
Cont	100	100	100	98.6667	98.6667	97.3333	97.3333	97.3333	97.3333	97.3333	96	96	96	96	96	96	96	94.6667	94.6667	94.6667	94.6667	94.6667	94.6667	94.6667	94.6667	94.6667	94.6667	94.6667	94.6667	94.6667	94.6667	94.6667	94.6667	94.6667	94.6667	94.6667	94.6667	94.6667	93.3333	93.3333	92	92	92	89.3333	89.3333	85.3333	85.3333	69.3333	69.3333
NP15.6	100	100	100	97.4359	97.4359	96.1538	96.1538	96.1538	96.1538	96.1538	94.8718	94.8718	94.8718	94.8718	94.8718	93.5897	93.5897	93.5897	93.5897	93.5897	93.5897	93.5897	88.4615	88.4615	83.3333	83.3333	78.2051	78.2051	78.2051	64.1026	64.1026	64.1026	64.1026	48.7179	48.7179	48.7179	35.8974	35.8974	14.1026	14.1026	0	0	0	0	0	0	0	0	0
NP15.6 TYR 1X	100	100	100	98.6667	98.6667	97.3333	97.3333	97.3333	97.3333	97.3333	97.3333	97.3333	97.3333	97.3333	97.3333	97.3333	97.3333	97.3333	97.3333	97.3333	97.3333	97.3333	97.3333	97.3333	96	96	90.6667	90.6667	90.6667	81.3333	81.3333	78.6667	78.6667	61.3333	61.3333	61.3333	45.3333	45.3333	32	32	14.6667	14.6667	14.6667	0	0	0	0	0	0
NP15.6 TYR 2.5X	100	100	100	100	100	100	100	97.4026	97.4026	97.4026	97.4026	97.4026	94.8052	94.8052	94.8052	94.8052	94.8052	93.5065	93.5065	93.5065	93.5065	93.5065	92.2078	92.2078	92.2078	92.2078	90.9091	90.9091	90.9091	77.9221	77.9221	76.6234	76.6234	70.1299	70.1299	70.1299	50.6494	50.6494	32.4675	32.4675	20.7792	20.7792	20.7792	1.2987	1.2987	0	0	0	0
NP15.6 TYR 5X	100	100	100	100	100	100	100	100	100	100	100	100	100	100	100	100	100	97.4359	97.4359	97.4359	97.4359	97.4359	85.8974	85.8974	82.0513	82.0513	80.7692	80.7692	80.7692	76.9231	76.9231	74.359	74.359	67.9487	67.9487	67.9487	52.5641	52.5641	38.4615	38.4615	23.0769	23.0769	23.0769	1.28205	1.28205	0	0	0	0
NP15.6 TYR 10X	100	100	100	100	100	100	100	100	100	100	100	100	100	100	100	100	100	100	100	98.7013	98.7013	98.7013	98.7013	98.7013	97.4026	97.4026	94.8052	94.8052	94.8052	81.8182	81.8182	80.5195	80.5195	62.3377	62.3377	62.3377	36.3636	36.3636	14.2857	14.2857	1.2987	1.2987	1.2987	0	0	0	0	0	0
Supplementary Figure 5c
Lifespans of male (D) tubulin-Gal80ts, tubulin-Gal4 flies expressing either control RNAi or RNAi against NP15.6 fed with the range of tyrosine concentrations (1X = 0.5g/L).
3-4 replicates/condition for treatments, combined
Days	1	2	3	4	5	6	7	8	9	10	11	12	13	14	15	16	17	18	19	20	21	22	23	24	25	26	27	28	29	30	31	32	33	34	35	36	37	38	39	40	41	42	43	44	45	46	47	48	49
Cont	0	0	1	0	1	0	0	1	0	0	0	0	0	0	0	0	0	0	0	0	0	0	0	0	0	0	0	0	0	0	0	0	0	0	0	2	0	2	0	5	0	0	23	0	12	0	10	0	0
NP15.6	0	0	1	0	1	0	0	1	0	0	0	0	0	0	1	0	1	0	0	0	0	0	0	0	0	0	0	0	4	0	0	0	1	0	0	4	0	4	0	32	0	0	18	0	0	0	0	0	0
NP15.6 TYR 1X	0	0	1	0	1	0	0	2	0	0	0	0	0	0	0	0	0	0	0	0	0	0	0	1	0	2	0	0	0	0	0	0	3	0	0	6	0	3	0	6	0	0	24	0	9	0	11	0	0
NP15.6 TYR 2.5X	0	0	0	0	0	0	0	0	0	0	0	0	0	0	0	0	0	0	0	0	0	0	0	0	0	0	0	0	0	0	0	0	2	0	0	8	0	3	0	9	0	0	33	0	12	0	2	0	0
NP15.6 TYR 5X	0	0	0	0	0	0	0	0	0	0	0	0	0	0	0	0	0	0	0	0	0	1	0	0	0	0	0	0	1	0	0	0	4	0	0	6	0	9	0	6	0	0	23	0	9	0	11	0	0
NP15.6 TYR 10X	0	0	0	0	0	0	0	0	0	1	0	0	0	0	1	0	0	0	0	0	0	0	0	2	0	0	0	0	0	0	0	0	1	0	0	18	0	27	0	12	0	0	13	0	0	0	0	0	0
Days	1	2	3	4	5	6	7	8	9	10	11	12	13	14	15	16	17	18	19	20	21	22	23	24	25	26	27	28	29	30	31	32	33	34	35	36	37	38	39	40	41	42	43	44	45	46	47	48	49
Cont	70	70	70	69	69	68	68	68	67	67	67	67	67	67	67	67	67	67	67	67	67	67	67	67	67	67	67	67	67	67	67	67	67	67	67	67	65	65	63	63	58	58	58	35	35	23	23	13	13
NP15.6	68	68	68	67	67	66	66	66	65	65	65	65	65	65	65	64	64	63	63	63	63	63	63	63	63	63	63	63	63	59	59	59	59	58	58	58	54	54	50	50	18	18	18	0	0	0	0	0	0
NP15.6 TYR 1X	78	78	78	77	77	76	76	76	74	74	74	74	74	74	74	74	74	74	74	74	74	74	74	74	73	73	71	71	71	71	71	71	71	68	68	68	62	62	59	59	53	53	53	29	29	20	20	9	9
NP15.6 TYR 2.5X	69	69	69	69	69	69	69	69	69	69	69	69	69	69	69	69	69	69	69	69	69	69	69	69	69	69	69	69	69	69	69	69	69	67	67	67	59	59	56	56	47	47	47	14	14	2	2	0	0
NP15.6 TYR 5X	73	73	73	73	73	73	73	73	73	73	73	73	73	73	73	73	73	73	73	73	73	73	72	72	72	72	72	72	72	71	71	71	71	67	67	67	61	61	52	52	46	46	46	23	23	14	14	3	3
NP15.6 TYR 10X	75	75	75	75	75	75	75	75	75	75	74	74	74	74	74	73	73	73	73	73	73	73	73	73	71	71	71	71	71	71	71	71	71	70	70	70	52	52	25	25	13	13	13	0	0	0	0	0	0
Days	1	2	3	4	5	6	7	8	9	10	11	12	13	14	15	16	17	18	19	20	21	22	23	24	25	26	27	28	29	30	31	32	33	34	35	36	37	38	39	40	41	42	43	44	45	46	47	48	49
Cont	100	100	100	98.5714	98.5714	97.1429	97.1429	97.1429	95.7143	95.7143	95.7143	95.7143	95.7143	95.7143	95.7143	95.7143	95.7143	95.7143	95.7143	95.7143	95.7143	95.7143	95.7143	95.7143	95.7143	95.7143	95.7143	95.7143	95.7143	95.7143	95.7143	95.7143	95.7143	95.7143	95.7143	95.7143	92.8571	92.8571	90	90	82.8571	82.8571	82.8571	50	50	32.8571	32.8571	18.5714	18.5714
NP15.6	100	100	100	98.5294	98.5294	97.0588	97.0588	97.0588	95.5882	95.5882	95.5882	95.5882	95.5882	95.5882	95.5882	94.1176	94.1176	92.6471	92.6471	92.6471	92.6471	92.6471	92.6471	92.6471	92.6471	92.6471	92.6471	92.6471	92.6471	86.7647	86.7647	86.7647	86.7647	85.2941	85.2941	85.2941	79.4118	79.4118	73.5294	73.5294	26.4706	26.4706	26.4706	0	0	0	0	0	0
NP15.6 TYR 1X	100	100	100	98.7179	98.7179	97.4359	97.4359	97.4359	94.8718	94.8718	94.8718	94.8718	94.8718	94.8718	94.8718	94.8718	94.8718	94.8718	94.8718	94.8718	94.8718	94.8718	94.8718	94.8718	93.5897	93.5897	91.0256	91.0256	91.0256	91.0256	91.0256	91.0256	91.0256	87.1795	87.1795	87.1795	79.4872	79.4872	75.641	75.641	67.9487	67.9487	67.9487	37.1795	37.1795	25.641	25.641	11.5385	11.5385
NP15.6 TYR 2.5X	100	100	100	100	100	100	100	100	100	100	100	100	100	100	100	100	100	100	100	100	100	100	100	100	100	100	100	100	100	100	100	100	100	97.1014	97.1014	97.1014	85.5072	85.5072	81.1594	81.1594	68.1159	68.1159	68.1159	20.2899	20.2899	2.89855	2.89855	0	0
NP15.6 TYR 5X	100	100	100	100	100	100	100	100	100	100	100	100	100	100	100	100	100	100	100	100	100	100	98.6301	98.6301	98.6301	98.6301	98.6301	98.6301	98.6301	97.2603	97.2603	97.2603	97.2603	91.7808	91.7808	91.7808	83.5616	83.5616	71.2329	71.2329	63.0137	63.0137	63.0137	31.5068	31.5068	19.1781	19.1781	4.10959	4.10959
NP15.6 TYR 10X	100	100	100	100	100	100	100	100	100	100	98.6667	98.6667	98.6667	98.6667	98.6667	97.3333	97.3333	97.3333	97.3333	97.3333	97.3333	97.3333	97.3333	97.3333	94.6667	94.6667	94.6667	94.6667	94.6667	94.6667	94.6667	94.6667	94.6667	93.3333	93.3333	93.3333	69.3333	69.3333	33.3333	33.3333	17.3333	17.3333	17.3333	0	0	0	0	0	0
[truncated: 77 more columns]
